1 **Decoding accelerometry for classification and**  
2 **prediction of critically ill patients with severe brain**  
3 **injury**

4  
5 **Shubhayu Bhattacharyay<sup>1,2,3,4,\*</sup>, John Rattray<sup>5</sup>, Matthew Wang<sup>3</sup>, Peter H.**  
6 **Dziedzic<sup>1,6</sup>, Eusebia Calvillo<sup>7</sup>, Han B. Kim<sup>1,7</sup>, Eshan Joshi<sup>3</sup>, Pawel Kudela<sup>6,8</sup>,**  
7 **Ralph Etienne-Cummings<sup>5</sup>, Robert D. Stevens<sup>1,6,7,8</sup>**

8  
9 <sup>1</sup>Laboratory of Computational Intensive Care Medicine, Johns Hopkins University,  
10 Baltimore, MD, USA.

11 <sup>2</sup>Department of Clinical Neurosciences, University of Cambridge, Cambridge, UK.

12 <sup>3</sup>Department of Biomedical Engineering, Johns Hopkins University, Baltimore, MD,  
13 USA.

14 <sup>4</sup>Department of Applied Mathematics and Statistics, Johns Hopkins University,  
15 Baltimore, MD, USA.

16 <sup>5</sup>Department of Electrical and Computer Engineering, Johns Hopkins University,  
17 Baltimore, MD, USA.

18 <sup>6</sup>Department of Anesthesiology and Critical Care Medicine, Johns Hopkins  
19 University, Baltimore, MD, USA

20 <sup>7</sup>Department of Neurosurgery, Johns Hopkins University, Baltimore, MD, USA.

21 <sup>8</sup>Department of Neurology, Johns Hopkins University, Baltimore, MD, USA.

22

23 \*Corresponding author: [sb2406@cam.ac.uk](mailto:sb2406@cam.ac.uk)

24 **ABSTRACT**

25

26 Our goal is to explore quantitative motor features in critically ill patients with severe  
27 brain injury (SBI). We hypothesized that computational decoding of these features  
28 would yield information on underlying neurological states and outcomes. Using  
29 wearable microsensors placed on all extremities, we recorded a median 24.1 (IQR:  
30 22.8–25.1) hours of high-frequency accelerometry data per patient from a  
31 prospective cohort ( $n = 69$ ) admitted to the ICU with SBI. Models were trained using  
32 time-, frequency-, and wavelet-domain features and levels of responsiveness and  
33 outcome as labels. The two primary tasks were detection of levels of  
34 responsiveness, assessed by motor sub-score of the Glasgow Coma Scale (GCSm),  
35 and prediction of functional outcome at discharge, measured with the Glasgow  
36 Outcome Scale–Extended (GOSE). Detection models achieved significant (AUC:  
37 0.70 [95% CI: 0.53–0.85]) and consistent (observation windows: 12 min – 9 hours)  
38 discrimination of SBI patients capable of purposeful movement (GCSm > 4).  
39 Prediction models accurately discriminated patients of upper moderate disability or  
40 better (GOSE > 5) with 2–6 hours of observation (AUC: 0.82 [95% CI: 0.75–0.90]).  
41 Results suggest that time series analysis of motor activity yields clinically relevant  
42 insights on underlying functional states and short-term outcomes in patients with  
43 SBI.

## 44 INTRODUCTION

45

46 Severe brain injury (SBI), defined as an acute injury to or illness in the brain that  
47 impairs consciousness, imposes the greatest global burden of mortality, long-term  
48 disability, and economic cost among all major injury types [1]. Despite other  
49 advances in intensive care medicine, existing approaches to predict SBI outcomes,  
50 such as recovery of consciousness and functional independence, in the intensive  
51 care unit (ICU) are imprecise for individual patients [2] and can raise ethical  
52 concerns due to the potential for withdrawal of life-sustaining therapies (WLST) [3].  
53 For example, both general ICU outcome prediction models – e.g., the Acute  
54 Physiologic Assessment and Chronic Health Evaluation [4] (APACHE) II – and  
55 models developed for specific types of SBI – e.g., the International Mission for  
56 Prognosis and Analysis of Clinical Trials in Traumatic Brain Injury [5] (IMPACT)  
57 model – are calculated at 24 hours after ICU admission and thus disregard the  
58 dynamic, heterogenous pathophysiological process that unfolds after SBI [6,7]. At  
59 the same time, recent developments in artificial intelligence and big data processing  
60 represent an opportunity to enhance SBI patient monitoring with high-resolution,  
61 longitudinal waveform data and to improve the precision of SBI prognostication with  
62 flexible modeling strategies [8]. Hence, a key focus in the care of SBI is the  
63 discovery and validation of quantitative monitoring modalities that improve upon the  
64 precision of clinical characterization and the accuracy and reliability of predicted  
65 outcomes [9].

66

67 For acute neurological disorders, the assessment of motor function provides a  
68 unique window into neural systems associated with sensorimotor processing,  
69 emotion, coordination, planning, and learning [10–12]. Neurological damage and ICU  
70 practices (e.g., sedation, bedrest) are associated with a dramatic reduction in normal  
71 physical activity [13], which may result in systemic pro-inflammatory signaling [14]  
72 and an elevated risk of venous thromboembolism, infection, skin and soft tissue  
73 damage, delirium, and loss of muscle mass and strength [15–18]. A corollary is that  
74 structured programs designed to increase physical activity for SBI patients in the ICU  
75 can significantly reduce neurological complications and may lead to improved  
76 functional recovery [19]. However, it is uncertain whether the computational analysis  
77 of continuously recorded motion in the ICU could yield clinically significant gains for  
78 SBI monitoring and prognosis.

79

80 Wearable accelerometers provide an objective and continuous assessment of motor  
81 activity over extended periods of time [20]. In contrast to most other motion sensing  
82 modalities [21], integration of accelerometers in the ICU is feasible. Advances in  
83 microelectromechanical systems (MEMS) technology have made it possible to  
84 construct inexpensive, minimally obtrusive wearable accelerometers that can be  
85 optimized for the clinical space [22]. Accelerometers respond to changes in  
86 movement frequency and intensity, measure tilt from the gravitational axis, and  
87 produce little variation or drift over time [22–26]. The use of accelerometers to  
88 monitor gross physical activity in the ICU has already been tested with varying  
89 degrees of success [27]. Herein, we aim to more specifically determine whether a  
90 relationship exists between motion features derived from triaxial accelerometry time-  
91 series and neurological motor states and functional outcomes of SBI patients.

92

93 In this pilot study of the Neurological Injury Motion Sensing (NIMS) project, we  
94 explore the impact and limitations of high-resolution accelerometry in patients with  
95 SBI admitted to the ICU. We developed a matrix of wearable accelerometers to  
96 quantitatively capture motor activity from the extremities of SBI patients. Applying  
97 techniques from time-series analysis, dimensionality reduction, and logistic  
98 regression, we extract interpretable time-, frequency-, and wavelet-domain motion  
99 features and assess their performance in motor function detection and short- and  
100 long-term functional outcome prediction models. We then assess relative  
101 significance of the extracted features to determine how specific accelerometry  
102 profiles relate to clinically evaluated motor function and global outcomes. Finally,  
103 through a retrospective case analysis, we demonstrate how accelerometry-based  
104 model outputs can potentially be used to monitor neurological transitions.

105

## 106 **RESULTS**

107

### 108 **Study population characteristics**

109

110 Of the 72 total SBI patients recruited in the ICU, 3 participants were excluded from  
111 the study due to withdrawn consent ( $n = 2$ ) or corruption of accelerometry data  
112 during upload ( $n = 1$ ), resulting in a study population of  $n = 69$ . Five patients were  
113 lost from one-year follow-up due to unsuccessful contact, and thus the study  
114 population at 12 months post hospital discharge was  $n = 64$ . A Consolidated  
115 Standards of Reporting Trials [28] (CONSORT)-style flow diagram for patient  
116 enrollment and follow-up is provided in **Supplementary Figure S1 online**, and  
117 detailed characteristics of the study population are summarized in **Table 1**.

118

119 From each of the study participants, we collected triaxial accelerometry data  
120 (sampled at 10 Hz) from a wearable matrix of 6 sensors, placed on each elbow,  
121 wrist, and ankle and an additional sensor placed on the bed for external movement  
122 correction (**Fig. 1a**). The median recording duration per patient was 24.09 hours  
123 (IQR: 22.81–25.11 hours), and accelerometry data was recorded fairly uniformly  
124 across the stages of ICU stay in terms of proportion completed (**Supplementary Fig.**  
125 **S2 online**). In total, 1,701 hours of multisegmental accelerometry data were  
126 recorded.

127

128 During their stay in the ICU (median: 19 days, IQR: 11–29 days), study participants  
129 were evaluated with the Glasgow Coma Scale (GCS) [29,30] a median 9.25 times  
130 per day (IQR: 7.17–11.50 times per day). In total, we extracted scores from 14,240  
131 GCS evaluations, 13,190 of which (92.63%) took place in the ICU and 653 of which  
132 (4.59%) coincided with accelerometry capture times. The individual trajectory of the  
133 motor component scores of the GCS (GCS<sub>m</sub>), along with corresponding times of  
134 accelerometry capture, of each patient included in our analysis is provided in  
135 **Supplementary Figure S3 online**.

136

### 137 **Motor function detection performance**

138

139 In this work, we use clinically evaluated GCS<sub>m</sub> scores extracted from electronic  
140 health records (EHR) at any point during ICU stay as the primary labels of functional  
141 motor states. The scores of the 6-point GCS<sub>m</sub> are defined by best motor responses  
142 obtained spontaneously and to graded physical stimuli and are outlined in **Table 1**.

143

144 We trained and evaluated threshold-level GCSm detection models from automated  
145 accelerometry-based motion features extracted from 19 varying observation  
146 windows, from 3 minutes to 24 hours, directly preceding the GCSm evaluations (**Fig.**  
147 **1b**). The count distributions of GCSm scores available for each observation window  
148 are listed in **Supplementary Table S1 online**.

149

150 The receiver operating characteristic (ROC) curves of the optimally discriminating  
151 models at each GCSm threshold, along with their mean areas under the curves  
152 (AUC) and optimal observation windows, are shown in **Figure 2a**. Based on the 95%  
153 confidence intervals of mean AUC, significant discrimination ( $AUC > 0.5$ ,  $\alpha = 0.05$ )  
154 was achieved by the extracted features at every threshold of GCSm except for  
155  $GCSm > 2$ . However, only  $GCSm > 4$  detection models achieve significant  
156 discrimination from shorter observation window durations ( $\leq 30$  minutes);  $GCSm > 4$   
157 detection models achieve significant discrimination consistently with an observation  
158 window of 12 minutes or greater (**Fig. 2b**). The mean AUCs, along with 95%  
159 confidence intervals, at each threshold of GCSm is provided for all 19 tested  
160 observation windows in **Supplementary Table S2 online**. As  $GCSm > 1$ ,  $GCSm >$   
161  $3$ , and  $GCSm > 5$  detection models achieve significant discrimination at less than or  
162 equal to 3 different observation windows, only  $GCSm > 4$  detection models achieve  
163 significant discrimination at a broad range of observation windows (12 min – 9  
164 hours). Binary classification performance metrics of optimally discriminating motor  
165 function detection models are provided in **Table 2**. At none of the GCSm thresholds  
166 do the models achieve significantly greater accuracy than the proportion of the most  
167 represented class based on 95% confidence intervals. Only the  $GCSm > 4$  detection  
168 model achieves a higher mean accuracy (0.71) and a significantly greater  $F_1$  score  
169 (0.78 [95% CI: 0.67–0.87]) than its proportion of the most represented (in this case,  
170 positive) class (0.66). Only  $GCSm > 4$  and  $GCSm > 5$  detection models achieved  
171 both a mean sensitivity and mean specificity over 0.5, but not significantly.

172

### 173 **Functional outcome at hospital discharge prediction performance**

174

175 We used clinically evaluated Glasgow Outcome Scale – Extended (GOSE) scores as  
176 the primary indicator of functional outcomes, both at hospital discharge and at 12  
177 months post discharge. The scores of the 8-point GOSE are outlined in **Table 1**.

178

179 We trained and evaluated threshold-level GOSE at hospital discharge prediction  
180 models from automated accelerometry-based motion features extracted from the  
181 same 19 varying observation windows directly preceding GCSm evaluations (**Fig.**  
182 **1b**). The median lead window duration (i.e., time between end of observation window  
183 and hospital discharge) was 20 days (IQR: 10–33 days). The count distributions of  
184 GOSE scores, at discharge, available for each observation window are listed in  
185 **Supplementary Table S3 online**. Given the low proportion of patients (1.45%) with  
186 good recovery ( $GOSE > 6$ ) at hospital discharge, we limited our threshold-level  
187 analysis to  $GOSE > 1$ ,  $GOSE > 2$ ,  $GOSE > 3$ ,  $GOSE > 4$ , and  $GOSE > 5$ .

188

189 The receiver operating characteristic (ROC) curves of the optimally discriminating  
190 models at each GOSE threshold, along with their mean areas under the curves  
191 (AUC) and optimal observation windows, are shown in **Figure 3a**. Based on the 95%  
192 confidence intervals of mean AUC, significant discrimination ( $AUC > 0.5$ ,  $\alpha = 0.05$ )



193 was achieved by the extracted features only at  $\text{GOSE} > 5$ .  $\text{GOSE} > 5$  prediction  
194 models achieve significant discrimination at observation windows of two hours or  
195 greater, with a peak mean AUC of 0.82 (95% CI: 0.75–0.90) at an observation  
196 window duration of 6 hours (**Fig. 3b**). The mean AUCs, along with 95% confidence  
197 intervals, at each tested threshold of GOSE is provided for all 19 tested observation  
198 windows in **Supplementary Table S4 online**.

199

200 Binary classification performance metrics of optimally discriminating functional  
201 outcome prediction models are provided in **Table 2**. At none of the GOSE thresholds  
202 do the models achieve a significantly greater  $F_1$  score than the proportion of the  
203 positive class or a greater mean accuracy than the proportion of the most  
204 represented class. Despite its strong discrimination performance, the  $\text{GOSE} > 5$   
205 prediction model had low precision and sensitivity. From the precision recall curve for  
206 this model (**Supplementary Fig. S4 online**), we observe a mean average precision  
207 of 0.08 (95% CI: 0.02–0.18), which, while low, is significantly greater than the  
208 proportion of the positive class (0.02). This indicates, that while prediction  
209 probabilities for true positive cases are, on average, greater than prediction  
210 probabilities for true negative cases, they seldom cross the 0.5 threshold for proper  
211 classification (**Supplementary Fig. S4 online**).

212

### 213 **Functional outcome at 12 months post discharge prediction performance**

214

215 We trained and evaluated threshold-level GOSE at 12 ( $\pm 1$ ) months post hospital  
216 discharge prediction models from automated accelerometry-based motion features  
217 extracted from the same 19 varying observation windows directly preceding GCSm  
218 evaluations (**Fig. 1b**). The count distributions of GOSE scores, at 12 months,  
219 available for each observation window are listed in **Supplementary Table S5**  
220 **online**. The receiver operating characteristic (ROC) curves of the optimally  
221 discriminating models at each GOSE threshold, along with their mean areas under  
222 the curves (AUC) and optimal observation windows, are shown in **Supplementary**  
223 **Figure S5 online**. Based on the 95% confidence intervals of mean AUC, significant  
224 discrimination ( $\text{AUC} > 0.5$ ,  $\alpha = 0.05$ ) was not achieved by the extracted features at  
225 any of the GOSE thresholds. Mean AUC is largely independent of observation  
226 window duration at each of the thresholds (**Supplementary Fig. S5 online**). The  
227 mean AUCs, along with 95% confidence intervals, at each threshold of GOSE is  
228 provided for all 19 tested observation windows in **Supplementary Table S6 online**.  
229 Binary classification performance metrics of optimally discriminating functional  
230 outcome prediction, at 12 months post discharge, models are provided in **Table 2**.

231

### 232 **Calibration of motor function detection and functional outcome prediction**

233

234 The probability calibration curves and associated prediction distributions of the  
235 optimally discriminating models at each threshold for GCSm detection and GOSE (at  
236 hospital discharge) prediction are provided in **Supplementary Figure S6 online**. We  
237 observe that the  $\text{GCSm} > 4$  detection model achieves the best graphical model  
238 calibration of all those tested ( $E_{max} = 0.30$  [95% CI: 0.08–0.64]). However, when  
239 considering the prevalence of predicted probabilities in calibration assessment with  
240 the integrated calibration index (ICI) [31], we observe that the  $\text{GOSE} > 5$  prediction  
241 model has the most ideal calibration (ICI = 0.01 [95% CI: 0.00–0.02]). The  
242 discrepancy between the weighted and graphical calibration of  $\text{GOSE} > 5$  indicates a

243 strong class imbalance, suggesting that more positive cases are necessary to train  
244 and recalibrate this model for proper classification. Probability calibration metrics of  
245 all optimally discriminating models are provided in **Supplementary Table S7 online**.

246

### 247 **Extracted feature and sensor placement analysis**

248

249 At the end of our accelerometry processing pipeline (**Fig. 1**), we extracted eight  
250 unique feature types (**Table 3**) from each of the six accelerometers placed on SBI  
251 patient joints. For each of these 48 feature-sensor combinations, we calculate a  
252 relative significance score equivalent to the mean absolute value of the learned  
253 coefficients of supervised dimensionality reduction (i.e., the relative importance in  
254 explaining the variance in the dataset stratified by the endpoint) weighted by the  
255 absolute value of learned logistic regression coefficients (see **Methods**).

256

257 We consider the optimally discriminating configurations of the two most promising  
258 model types as representatives for motor function detection and functional outcome  
259 prediction respectively: (a) GCSm > 4 with a 6-hour observation window and (b)  
260 GOSE (at hospital discharge) > 5 with a 6-hour observation window. The feature  
261 significance scores of these two model types are visualized as heatmaps in **Fig. 4a**  
262 and **Fig. 4b** respectively.

263

264 For both motor function detection and functional outcome prediction, there is more  
265 variation in significance scores across feature types than across sensor placements.  
266 For motor function detection, the proportion of dynamic activity (PDA) in the  
267 observation window, the frequency-domain entropy (FDE), and the median  
268 frequency (MFR) are the three most significant feature types, descending in that  
269 order. For functional outcome prediction, the descending order of the three most  
270 significant feature types is FDE, MFR, and PDA. PDA is a crude measurement of  
271 overall physical activity [32], while FDE enables differentiation between activity  
272 profiles which have simple acceleration patterns and those with more complex  
273 patterns [20]. From the pair of high-pass-filtered medians (HLF (h)) and low-pass-  
274 filtered medians (HLF (l)), HLF (h) has a significantly greater mean significance  
275 score than HLF (l) for every sensor placement in both model endpoints based on  
276 95% confidence intervals. This, along with the relative significance of MFR, suggests  
277 that finer movements, captured in higher frequencies of accelerometry, can be more  
278 clinically significant in discriminating functional motor states and global outcomes  
279 from SBI. Moreover, the consistently strong significance of PDA, FDE, and MFR  
280 suggests that features of both the time domain (PDA) and the frequency domain  
281 (FDE, MFR) in combination may be useful for clinical assessments of functional  
282 neurological states.

283

284 In detecting motor function, the right wrist (RW) sensor was the most significant  
285 placement across the five most significant feature types. The trajectories of mean  
286 motion feature values in the six hours preceding GCSm evaluations  
287 (**Supplementary Fig. S7 online**) visually demonstrate that features extracted from  
288 the wrist-placed sensors better discriminate cases of GCSm 5 and 6 from the rest of  
289 the GCSm scores. This follows clinical observations of a greater frequency of  
290 conscious movement in hands and wrists of bedridden SBI patients during ICU stay.  
291 Moreover, abnormal profiles of flexion and extension, associated with SBI, are most  
292 often observed in the wrists, and thus, the wrist-placed sensors may be more

293 sensitive to abnormal patterns of movement, corresponding to lower levels of  
294 consciousness, than the elbow- or ankle-placed sensors.

295

296 In functional outcome prediction, we observe the greatest significance scores  
297 ascribed to wrist-placed sensors (RW and LW) in the most significant frequency-  
298 domain features (FDE and MFR), but the ankle- (RA and LA) and elbow-placed  
299 sensors have the greatest significance scores in the most significant time-domain  
300 features (PDA, SMA, and HLF (h)). Wrist movements are finer than elbow and ankle  
301 movements and may be best distinguished in the frequency-domain in relation to  
302 global outcomes.

303

304 The correlation of each of the extracted motion features across the six sensor  
305 placements is visualized in **Supplementary Figure S8 online**, and violin plots of the  
306 distributions of motion features, stratified by GCSm, are presented in  
307 **Supplementary Figure S9 online**.

308

### 309 **Retrospective case study analysis of motor function detection in practice**

310

311 The final goal of this study was to determine how the motion feature-based  
312 predictions would react, in real-time, to instances in which a patient's functional  
313 motor state changed. From six of our study participants, we happened to have  
314 recorded accelerometry while they experienced at least one transition between  
315  $GCSm > 4$  and  $GCSm \leq 4$  with at least six hours of recording (for an observation  
316 window) before the transition(s). For each of these patients, we trained two different  
317  $GCSm > 4$  detection models on the remaining patient set: one with the best short  
318 ( $<30$  minutes) observation window (27 minutes) and one with the best long ( $\geq 1$  hour)  
319 observation window (6 hours) based on overall discrimination performance  
320 (**Supplementary Table S2**). We selected two distinct observation windows to  
321 understand the effect of window duration on responsiveness to motor state  
322 transition. With all of the trained models, we returned predictions with a sliding  
323 window (step: 10 minutes) on the corresponding case study patient to retrospectively  
324 examine the trajectories of detection probabilities against the recorded times of  
325 GCSm transition (**Fig. 5**).

326

327 In case no. 2, we observed that both model types detect an upward transition in  
328 GCSm more than three hours before it was recorded clinically. Likewise, the 27-min  
329 observation window model detected a downward transition in GCSm about an hour  
330 before the upcoming evaluation in case no. 4 and about two hours before in case no.  
331 3. In cases no. 3, 4, and 6, we observed that the 6-hour observation window detects  
332 the appropriate transition in GCSm, but with a delay of 3–6 hours. In cases no. 1 and  
333 5, in which we observe a shift and resettlement of GCSm within a 3–5-hour span, the  
334 6-hour model fails to detect the transition while the 27-min model uncertainly  
335 oscillates above and below the midline. In general, the shorter observation window  
336 model was more dynamic and detected GCSm transitions faster than the longer  
337 observation window model. However, persistent transitions, such as the one  
338 observed in case no. 6, were detected with greater stability and reliability by the  
339 longer observation window model.

340

## 341 **DISCUSSION**

342



## 343 **Key findings**

344

345 We introduce an accelerometry-based based system in critically ill SBI patients that  
346 quantitatively captures multisegmental motor patterns correlating with clinical scores  
347 of motor responsiveness and functional outcome. The results reveal a significant  
348 (AUC = 0.70 [95% CI: 0.53–0.85]), consistent (observation windows: 12 min – 9  
349 hours) association between extracted motion features and the discrimination of SBI  
350 patients capable of purposeful movement (GCSm > 4) and those who are not  
351 (GCSm ≤ 4) (**Fig. 2a**). A significant discrimination of purposeful movement was  
352 achieved with only 12 minutes of accelerometry recording (**Fig. 2b**), and reliable  
353 calibration (**Supplementary Fig. S6 online**) and informative classification (**Table 2**)  
354 for GCSm > 4 detection suggest that iterations of this system could be clinically  
355 useful in automating motor function monitoring. In case studies (**Fig. 5**), we  
356 demonstrate that accelerometry-based systems may detect transitions in motor  
357 function up to five hours before a clinical evaluation. We also find that the  
358 recommended observation window depends on clinical preference: the shorter (27-  
359 minute) observation window model reacts more quickly to daily GCSm transitions  
360 while the longer (6-hour) observation window model reacts more reliably to  
361 persistent transitions and achieves better overall discrimination performance.

362

363 The utility of accelerometry-based features for functional outcome prognosis remains  
364 unclear. While we found no signal between motion features and long-term (12  
365 months post discharge) outcomes (**Supplementary Fig. S5 online**), the models  
366 accurately predicted functional status at hospital discharge (AUC = 0.82 [95% CI:  
367 0.75–0.90]) at a cutoff of GOSE > 5 vs GOSE ≤ 5 for favorable vs unfavorable  
368 outcome (**Fig. 3a**). Patients with GOSE > 5 have upper moderate disability or good  
369 recovery and are generally able to resume work or previous activities. However,  
370 given the small number of SBI patients with GOSE > 5 at hospital discharge, further  
371 validation is necessary to determine the reliability of this result. Conflicting results  
372 between different calibration metrics (**Supplementary Table S7 online**) underline  
373 the class imbalance problem of GOSE > 5 in our dataset; at the same time, we find  
374 the consistent discrimination (**Fig. 3b**) and difference in outcome distribution  
375 (**Supplementary Fig. S4 online**) as promising markers for further exploration.

376

377 Finally, our analysis of feature significance (**Fig. 4**) reveals that both time-domain  
378 and frequency-domain features are important for motor function detection and  
379 functional outcome prediction. While sensors placed on the wrist achieved the  
380 greatest significance scores overall, particularly for features in the frequency-domain,  
381 multisegmental motion capture was validated by comparable significance scores of  
382 elbow- and ankle-placed sensors across the feature set.

383

## 384 **Relationship with previous studies and future implications**

385

386 Results presented here represent, to our knowledge, the first approach to relate  
387 quantitative motion time series data to neurological states in SBI patients admitted to  
388 the ICU. Activity classification with accelerometry-based features has become  
389 widespread outside of the clinical domain, especially with advancements in MEMS  
390 technology, machine learning, and data sharing [20,33–35]. However, applications to  
391 intrahospital care, particularly intensive care, have been limited [27,36] and have  
392 largely taken only simple, threshold-based feature approaches to grossly evaluate

393 motor activity (e.g., actigraphy) [37–40]. Reported success in these studies has been  
394 variable, but none of them have combined the high-resolution time-domain, feature-  
395 domain, and wavelet-domain analysis found in more recent healthy activity  
396 classification studies. The focus of our approach, on the relationship between motor  
397 profiles of SBI patients over extended periods of time and clinically relevant  
398 neurological states, is novel. It builds upon the developments in time-series analysis,  
399 dimensionality reduction, and supervised machine learning from activity classification  
400 projects as well as the hypotheses of the clinical validity and utility of accelerometry  
401 from applied, medical projects.

402  
403 A continuous high-frequency motion capture system in the intensive care setting  
404 produces a high-volume dataset that is also valuable for data-driven research  
405 projects. Profiles of motor activity in SBI are poorly understood and decoding specific  
406 features of motion in the time-, frequency-, and wavelet-domains can open a window  
407 on internal neurological states. Our results demonstrate both the potential and  
408 limitations of accelerometry-based monitoring in the ICU. On one hand, the poor  
409 overall performance on short-term (discharge) and long-term (12 month) outcome  
410 prediction suggest that our derived motion features may not provide enough reliable  
411 information to support integration into dynamic prognosis models or decision support  
412 systems for WLST. Conversely, when tied to functional motor states, accelerometry-  
413 based features may elucidate fundamental mechanisms underlying the strong  
414 association between physical activity and clinical outcomes. We aim to collect more  
415 data in the NIMS project and focus our research on the development of motion as a  
416 quantitative marker of functional recovery for SBI.

417  
418 More generally, the intensive care setting is a fertile ground for the development of  
419 advanced computational methods and applications of artificial intelligence for  
420 monitoring and decision support [41]. Patients are typically interfacing with  
421 physiological monitoring systems that generate a large volume of data whose  
422 complexity may overwhelm human interpretation alone but may be ideal for the  
423 training of analytical systems [42]. Since intensive care specialists typically must  
424 make time-sensitive decisions for multiple patients at the same time [43], we expect  
425 that a near-real-time computational framework assessing motion features alongside  
426 other time-series data continuously could provide valuable decision support. For  
427 example, a smart alarm system could continuously monitor motor activity in the ICU,  
428 and, in conjunction with other clinical factors, dynamically notify clinicians of  
429 changing physiology or therapeutic needs before it is too late. We expect that  
430 ongoing and subsequent iterations of this work will enable integration of  
431 computational physical activity features into the framework of monitoring, smart  
432 alarms, and prognostication in the critical care setting.

433

### 434 **Study limitations**

435

436 We recognize several limitations in this work that need to be addressed. Our  
437 statistical analyses and retrospective validation of GCSm detection and GOSE  
438 prediction were performed on a limited sample size ( $n = 69$  patients) from a single  
439 institution and intensive care facility. Further validation will require repeated trials on  
440 larger patient populations across multiple centers. There are also improvements to  
441 be done to the sensor itself. The planar dimensions of our currently used  
442 accelerometer (42 mm × 32 mm) can be reduced further to increase the resolution of

443 localized motion capture. Furthermore, since accelerometry measurements depend  
444 on the orientation of the accelerometer with respect to the vertical (gravitational  
445 axis), additional modalities of motor output (i.e., gyroscopy and electromyography)  
446 could be integrated into the sensor system to inform computational models on the  
447 precise arrangement and neural activation of body segments. This would allow us to  
448 derive more physiologically relevant features that correspond to validated models of  
449 nervous system injury or disease [10]. We also recommend the development of  
450 sensors with higher sampling frequencies ( $\geq 40$  Hz) to capture extremely fine or fast  
451 movements of digits or lower extremities. The clinical data collected in our study  
452 does not include potentially significant prognostic factors – e.g., features from  
453 brainstem assessments, neuroimaging, invasive brain monitoring,  
454 electrophysiological studies including evoked potentials, serum biomarkers, as well  
455 as therapeutic interventions (sedation, mechanical ventilation, administration of  
456 neuromuscular blocking agents or catecholaminergic agents) – that may be impactful  
457 in SBI recovery. Inclusion of these variables is likely to improve model performance  
458 and precision while also accounting for medical interventions that are likely to have  
459 an independent effect on physical activity. Additionally, GCSm itself has been  
460 criticized for lack of standardization among practitioners [44,45]. GCSm scores for  
461 this work were extracted automatically from EHR and were measured from multiple  
462 practitioners across the Johns Hopkins Hospital Neurosciences Critical Care Unit  
463 (NCCU) staff. Additionally, we did not record patient turning events, which are part of  
464 standardized nursing practices implemented in the ICU treatment of comatose and  
465 sedated patients. Moving forward, we aim to supplement clinical validation of the  
466 motion features with multifactorial associations with other consciousness, functional,  
467 cognitive, psycho-behavioral, symptomatic, and social outcome scales of SBI  
468 patients [46].

469

## 470 **METHODS**

471

### 472 **Study population and experimental protocol**

473

474 This work was conducted with approval from the Johns Hopkins Medicine  
475 Institutional Review Board (IRB00135674) and written informed consent from  
476 patients or surrogates. We prospectively enrolled 72 patients admitted to the NCCU  
477 who met the following criteria: age  $\geq 18$  years, SBI defined as an acute brain injury or  
478 illness resulting in impaired consciousness, absence of injuries or lesions involving  
479 the extremities, and not expected to die or have WLST in the 24 hours following  
480 enrollment. Three of these patients were excluded from the study due to withdrawal  
481 of consent ( $n = 2$ ) or corruption of accelerometry data during upload to cloud storage  
482 ( $n = 1$ ) (**Supplementary Fig. S1 online**).

483

484 Patients were evaluated daily while in the NCCU, at hospital discharge, and at 12  
485 months post discharge by research team members. All GCS evaluations during each  
486 patient's hospital stay were automatically extracted from the institutional EHR system  
487 (Epic Systems, Madison, WI, USA). For patients who survived through hospital stay  
488 ( $n = 53$ ), outcome scores at discharge were calculated by completing GOSE  
489 questionnaires [47] based off the neurological exam information on EHR discharge  
490 reports. At 12 months ( $\pm 1$  month) after hospital discharge, we were able to reach 36  
491 patients or carers by telephone and calculated GOSE scores either by performing a  
492 validated questionnaire [47] ( $n = 28$ ) or by being notified of the patient's death ( $n =$

493 8). We confirmed the death (within 12 months of hospital discharge) of 4 additional  
494 patients by matching their information with national obituary records. For 8 additional  
495 patients, we were able to find EHR notes from a follow-up clinical visit 11 – 13  
496 months after hospital discharge, and we were able to complete a GOSE  
497 questionnaire [47] from their neurological exam results. Thus, we lost 5 patients to  
498 follow-up ( $53 - 36 - 4 - 8 = 5$ ), and, including the 16 patients who died during  
499 hospital stay, our 12-month post-discharge sample size was  $n = 64$ . This information  
500 is also visualized as a flow diagram in **Supplementary Figure S1 online**.

501  
502 From the first 3 patients, we collected 10 hours of continuous triaxial accelerometry  
503 data, and for the remainder of the patients, we augmented our intended recording  
504 duration to between 24 and 48 hours.

### 505 506 **Instrumentation for accelerometry capture**

507  
508 Triaxial sensors (SensorTags CC2650, Texas Instruments, Dallas, TX, USA) were  
509 attached with transparent film dressing (Tegaderm Diamond Pattern 1686, 3M,  
510 Maplewood, MN, USA) bilaterally near the joints (with standardized orientation)  
511 designated in **Fig. 1a**. An additional sensor was placed vertically on the foot of the  
512 patient bed to detect patient-independent bed movements. Sensors were equipped  
513 with MEMS, variable capacitance tri-axial accelerometers (MPU-9250  
514 MotionTracking Device, TDK InvenSense, San Jose, CA, USA) with sampling  
515 frequency ( $f_s$ ) set to 10 Hz, the range of measurable amplitude at  $\pm 16 g$  ( $\pm 157 \text{ m/s}^2$ ),  
516 and sensitivity at  $\pm 4,800$  least significant bits per  $g$  (LSB/ $g$ ).

517  
518 The sensors transmitted data via a 2.4-GHz Bluetooth antenna to a portable Linux  
519 computer (RPI 3 Model B, Raspberry Pi Foundation, Cambridge, UK) placed in the  
520 NCCU room. We would execute a Python script on the computer to collect 3  
521 channels (axes) of accelerometry time series from each of the 7 active  
522 accelerometers in parallel. The system would log interruptions on a separate .txt file  
523 in the instance of a sensor failure. During each trial, we also recorded a video stream  
524 (M1045-LW Network Camera, Axis Communications, Lund, Sweden) of the patient  
525 that clearly shows the location of each sensor. In the event of sensor interruptions,  
526 irregular movement profiles, or bed-sensor-extracted signal magnitude area (SMA)  
527 values above  $0.135 g$  [32], we would check the footage to identify the source of  
528 these results.

### 529 530 **Accelerometry processing and motion feature extraction**

531  
532 Each axial component of each sensor was convolved with a 4<sup>th</sup>-order Butterworth  
533 high-pass filter with a critical frequency of  $f_c = 0.2 \text{ Hz}$  (**Supplementary Fig. S10**  
534 **online**) to remove the baseline offset of accelerometry readings (**Fig. 1a**) and  
535 generally separate the low frequency effect of static orientation from the high  
536 frequency effect of active body movement [48].

537  
538 Filtered time-series were segmented into non-overlapping 5-second windows (~50  
539 data points per window) for motion feature extraction. We selected the motion  
540 features listed in **Table 3**, which performed well in physical activity classification  
541 tasks [20], to represent three different domains (time, frequency, and wavelet). PDA  
542 is defined as the proportion of SMA over  $0.135 g$  for each sensor in an observation

543 window (**Fig. 1b**). The remaining features are defined by the following formulae for  
 544 each 5-second window:  
 545

$$\begin{aligned}
 \text{SMA} &= \frac{0.1 \text{ sec}}{2 \times 5 \text{ sec}} \sum_{n=1}^{N-1} (|x_{n+1}| + |y_{n+1}| + |z_{n+1}| + |x_n| + |y_n| + |z_n|) \\
 \text{HLF}_h &= \sqrt{(\text{median}\{x * b_h\})^2 + (\text{median}\{y * b_h\})^2 + (\text{median}\{z * b_h\})^2} \\
 \text{HLF}_l &= \sqrt{(\text{median}\{x * b_l\})^2 + (\text{median}\{y * b_l\})^2 + (\text{median}\{z * b_l\})^2} \\
 \text{MFR} &= \sqrt{(\text{median}\{X\})^2 + (\text{median}\{Y\})^2 + (\text{median}\{Z\})^2} \\
 \text{FDE} &= \frac{1}{\log_2 N} \sqrt{\left( \sum_{n=1}^N \frac{|X_n|^2}{\sum_{i=1}^N |X_i|^2} \log_2 \left( \frac{|X_n|^2}{\sum_{i=1}^N |X_i|^2} \right) \right)^2 + \left( \sum_{n=1}^N \frac{|Y_n|^2}{\sum_{i=1}^N |Y_i|^2} \log_2 \left( \frac{|Y_n|^2}{\sum_{i=1}^N |Y_i|^2} \right) \right)^2 + \left( \sum_{n=1}^N \frac{|Z_n|^2}{\sum_{i=1}^N |Z_i|^2} \log_2 \left( \frac{|Z_n|^2}{\sum_{i=1}^N |Z_i|^2} \right) \right)^2} \\
 \text{BPW} &= \frac{1}{3.2 \text{ Hz}} \sqrt{\left( \int_{0.3 \text{ Hz}}^{3.5 \text{ Hz}} |X_f|^2 df \right)^2 + \left( \int_{0.3 \text{ Hz}}^{3.5 \text{ Hz}} |Y_f|^2 df \right)^2 + \left( \int_{0.3 \text{ Hz}}^{3.5 \text{ Hz}} |Z_f|^2 df \right)^2} \\
 \text{WVL} &= \sqrt{\left( \sum_{l=2}^6 \|d_l^{(x)}\|^2 \right)^2 + \left( \sum_{l=2}^6 \|d_l^{(y)}\|^2 \right)^2 + \left( \sum_{l=2}^6 \|d_l^{(z)}\|^2 \right)^2}
 \end{aligned}$$

546

547 where:

- 548  $\otimes$   $x, y, z$  represent the x-, y- and z- axes vectors, respectively, of the filtered  
 549 accelerometry time series within the given 5 second window and  $x_n, y_n, z_n$   
 550 represent the  $n^{\text{th}}$  elements of these vectors.
- 551  $\otimes$   $N$  represents the length of each of the  $x, y, z$  vectors.
- 552  $\otimes$   $*$  represents the 1-dimensional convolution operator.
- 553  $\otimes$   $b_h$  represents a 1-dimensional, 4<sup>th</sup>-order high-pass Butterworth filter with  $f_c =$   
 554 2.5 Hz.
- 555  $\otimes$   $b_l$  represents a 1-dimensional, 4<sup>th</sup>-order low-pass Butterworth filter with  $f_c =$   
 556 2.5 Hz.
- 557  $\otimes$   $X, Y, Z$  represent the discrete Fourier transforms of the  $x, y, z$  vectors  
 558 respectively where  $X_n, Y_n, Z_n$  represent the  $n^{\text{th}}$  elements of these Fourier  
 559 transform vectors and  $X_f, Y_f, Z_f$  represent the coefficients of the Fourier  
 560 transforms that correspond to linear frequency  $f$ .
- 561  $\otimes$   $d_l^{(x)}, d_l^{(y)}, d_l^{(z)}$  represent the vector of  $l^{\text{th}}$ -level detail coefficients of the 5<sup>th</sup>-order  
 562 Daubechies wavelet transform of the  $x, y, z$  vectors respectively.

563

564 Post-capture processing of accelerometry were performed offline using MATLAB  
 565 (Version 9.8.0, MathWorks, Natick, MA, USA) with the Signal Processing, Wavelet,  
 566 System Identification, and Symbolic Toolboxes.

567

## 568 Multiple imputation of missing motion features

569

570 Due to insufficient battery on the sensors, bedside interventions, interfering  
 571 equipment, or patient migrations for surgery, imaging, or interunit transfers, a median  
 572 1.56% per sensor of each patient's intended recording duration was missing in our  
 573 dataset. Missing motion features were multiply imputed ( $m = 9$ ) with a normal  
 574 (features were normalized with the Box-Cox transform [49]) multivariate time-series  
 575 algorithm from the 'Amelia II' package (v1.7.6) [50] in R (v4.0.0) [51]. The algorithm  
 576 exploits both spatial correlation (motion feature correlation across the sensors of the  
 577 same participant) and temporal correlation (autocorrelation structures within each  
 578 sensor's time series) to stochastically impute missing time series values in multiple,  
 579 independently trained runs. We formed subsequent statistical analyses on all 9  
 580 imputations to account for variation across imputation.



581

582 This model assumes the data is missing at random (MAR) (i.e., the pattern of  
583 missingness is independent of unobserved data [52]), which we validated by  
584 observing the independence of missingness from sensor placement or time of day  
585 (**Supplementary Fig. S11 online**). A complete characterization of the missing data  
586 of each patient can be found in **Supplementary Table S8 online**.

587

### 588 **Correction of gross external movements**

589

590 At time points where the bed-placed sensor SMA exceeded 0.135 g (a proposed  
591 threshold between static and dynamic activity [32]) and preceded a spike in extremity  
592 feature values (1.33% of the time), the bed sensor values of SMA, HLF, BPW, and  
593 WVL were subtracted from the extremity values and the bed sensor values of MFR  
594 and FDE were added to the extremity values. If a resulting correction value ended up  
595 out of a feasible range of static activity for the feature, we replaced the value with a  
596 random value, selected uniformly from the static activity range of that feature  
597 (**Supplementary Table S9 online**).

598

### 599 **Repeated $k$ -fold cross-validation for unbiased model validation**

600

601 The study population ( $n = 69$ ) was partitioned 25 times with repeated  $k$ -fold cross-  
602 validation (5 repeats, 5 folds) into training sets (~80%,  $n \approx 55$ ) and validation sets  
603 (~20%,  $n \approx 14$ ) for each of the 19 tested observation windows (**Supplementary**  
604 **Table S1 online**) for each of the three tested endpoints (**Fig. 2b**). In splits for motor  
605 function detection, patients were stratified by median GCSm over their available  
606 observations, while in splits for functional outcome detection, patients were stratified  
607 by GOSE scores. One of the nine missing value imputations was drawn with  
608 replacement for each partition.

609

610 Repeated cross-validation partitions were performed with the 'caret' package (v6.0-  
611 86) [53] in R.

612

### 613 **Motor function detection**

614

615 We tested 19 unique observation window durations, from 3 minutes to 24 hours,  
616 (**Supplementary Table S1 online**) of accelerometry-derived features directly  
617 preceding GCSm evaluations (**Fig. 1b**) at any point during ICU stay. At each of these  
618 evaluation points, motion features were organized into matrices where each column  
619 represents a unique combination of motion feature type (8 total), sensor placement  
620 (6 total), and, for non-PDA features, time before the evaluation. Columns were  
621 normalized based on distributions of each placement-feature type combination (48 in  
622 total) in the training set. Normalized matrices underwent supervised dimensionality  
623 reduction with linear optimal low-rank projection (LOL) [54] learned from the training  
624 set. Target dimensionality ( $d \in [2,20]$ ) was tested as a model hyperparameter. Low-  
625 dimensional vectors of each  $d$  then underwent element-wise Yeo-Johnson  
626 transforms [55] for scaled normalization (learned from the training set) and were  
627 used to train and validate logistic regression ('glm') models with binary endpoints at  
628 each GCSm threshold. All these steps were performed in R.

629

### 630 **Functional outcome prediction**

631

632 The methodology for functional outcome prediction was identical to that of motor  
633 function detection except that GOSE thresholds instead of GCSm thresholds were  
634 used as endpoints.

635

### 636 **Assessment of model performance and calibration on validation sets**

637

638 Both motor function detection and functional outcome prediction models were trained  
639 and validated on each of the 25 repeated cross-validation splits for each of the 19  
640 observation windows for each of the 19 unique target dimensionalities ( $d$ ) for each of  
641 the endpoint thresholds (5 for GCSm, 5 for GOSE at discharge, 7 for GOSE at 12  
642 months). Models returned binary prediction probabilities as well as a classification  
643 based on a probability threshold of 0.5 for each validation set observation.

644

645 Based on the validation set predictions, we calculated metrics of binary outcome  
646 discrimination performance (**Supplementary Tables S2, S4, and S6 online**),  
647 classification performance (**Table 2**), and probability calibration [31,56] (**Table 3**).  
648 We also visualized ROC curves (**Fig. 2a, 3a, and Supplementary Fig. S5 online**),  
649 probability calibration curves (**Supplementary Fig. S6 online**), and, in one case, the  
650 precision recall curve (**Supplementary Fig. S4 online**) of the optimally  
651 discriminating (maximal AUC) models to assess discrimination, calibration, and case  
652 detection power respectively. We calculated unbiased mean values and 95%  
653 confidence intervals for both metrics and curves with bootstrap bias-corrected cross-  
654 validation (BBC-CV) with repeats [57] on 1,000 resamples of the patient set across  
655 the validation set predictions. In this way, 95% confidence intervals account for the  
656 variation across the patient set, across the nine missing value imputations, and  
657 across the 25 repeated cross-validation partitions.

658

### 659 **Feature significance scores**

660

661 The coefficients (i.e., loadings) of the trained LOL projection matrix represent the  
662 relative importance of each column in explaining the variance in the dataset stratified  
663 by the endpoint [54]. Thus, we derived a relative importance score of each sensor-  
664 feature type combination for both motor function detection and functional outcome  
665 prediction by multiplying the mean absolute value of the loadings per each  
666 combination and the absolute value of the trained logistic regression coefficient of  
667 the corresponding reduced dimension. This would be performed across all 25  
668 partitions of each combination of observation window, threshold, and endpoint. We  
669 then calculated 95% confidence intervals on feature significance scores by  
670 bootstrapping 1,000 resamples across the 25 repeated cross-validation folds and  
671 nine missing value imputations.

672

### 673 **Ethics and informed consent statement**

674

675 Informed consent was obtained from all participants or legally identified surrogates in  
676 this study and the procedure was approved by the Institutional Review Board of the  
677 Johns Hopkins Medicine Institutional Review Board (reference number:  
678 IRB00135674). All research was performed in accordance with relevant guidelines  
679 and regulations.

680

## 681 DATA AVAILABILITY

682

683 Per our current Johns Hopkins Medicine IRB protocol (IRB00135674), we are not  
684 permitted to share the clinical data collected for this study. However, we welcome all  
685 forms of collaboration, and urge interested investigators to contact the corresponding  
686 author (SB: [sb2406@cam.ac.uk](mailto:sb2406@cam.ac.uk)) with their institutional affiliation and proposed use  
687 of the dataset to submit a new protocol for access. The data may not be used for  
688 commercial products or redistributed in any way.

689

## 690 CODE AVAILABILITY

691

692 All code used in the data collection and analyses outlined in this manuscript can be  
693 found at the following GitHub repository [58]: <https://github.com/sbhattacharyay/nims>  
694 (DOI: 10.5281/zenodo.4765305).

695

## 696 ACKNOWLEDGEMENTS

697

698 We graciously acknowledge the patients, families, NCCU nurses, and physicians  
699 who participated in and contributed to this study. S.B. would like to thank Kathleen  
700 Mitchell-Fox (Univ. of Cambridge) for reviewing and offering comments on the  
701 manuscript. We also wish to specifically thank Aditya Joshi (Rowan Univ.), Sanya  
702 Yadav (Univ. of Pittsburgh), Tobias Fauser (Univ. of Arizona), Michiru Fredricks  
703 (Johns Hopkins Univ.), Alexander Sigmon (Johns Hopkins Univ.), Shikha Gandhi  
704 (Johns Hopkins Univ.), and Joshua Vogelstein (Johns Hopkins Univ.) for their roles  
705 in the early development, data curation, and advising of statistical methodologies of  
706 the NIMS project.

707

708 This work was partially supported by awards from the Johns Hopkins University  
709 Office of the Provost and the Hodson Trust, received by S.B. S.B. is currently funded  
710 by a Gates Cambridge fellowship.

711

## 712 AUTHOR CONTRIBUTIONS

713

714 S.B. co-conceptualized the study, developed the methodology of the experiments,  
715 acquired accelerometry data from patients, acquired funding for the project,  
716 performed statistical analyses on the data, visualized the results for publication, and  
717 wrote the complete manuscript. J.R. and R.E.C. aided in the conceptualization and  
718 data collection of this work and revised the manuscript. M.W., H.B.K., and E.J. aided  
719 S.B. in the statistical analysis, processing of data, and visualization of results. P.H.D.  
720 extracted neurological assessment scores from electronic health records. E.C.  
721 recruited patients for the study, performed clinical surveys, and collected clinical data  
722 from patient records. P.K. aided in the conceptualization of the study and the  
723 development of the methodology and established the data acquisition infrastructure.  
724 R.D.S. served as the principal investigator, co-conceptualized the study, aided in the  
725 development of the methodology, procured IRB approval for data collection from  
726 human subjects, aided in data collection, provided access to clinical resources at the  
727 Johns Hopkins Hospital, and revised the manuscript.

728

## 729 COMPETING INTERESTS STATEMENT

730

731 The authors declare that they have no conflicts of interest.

## 732 REFERENCES

733

734 1. Maas, A. I. R. *et al.* Traumatic brain injury: integrated approaches to improve  
735 prevention, clinical care, and research. *Lancet Neurol.* **16**, 987-1048 (2017).

736 2. Stevens, R. D. & Sutter, R. Prognosis in Severe Brain Injury. *Crit. Care Med.* **41**,  
737 1104-1123 (2013).

738 3. Turgeon, A. F. *et al.* Mortality associated with withdrawal of life-sustaining  
739 therapy for patients with severe traumatic brain injury: a Canadian multicentre  
740 cohort study. *CMAJ* **183**, 1581-1588 (2011).

741 4. Knaus, W. A., Draper, E. A., Wagner, D. P. & Zimmerman, J. E. APACHE II: a  
742 severity of disease classification system. *Crit. Care Med.* **13**, 818-829 (1985).

743 5. Steyerberg, E. W. *et al.* Predicting Outcome after Traumatic Brain Injury:  
744 Development and International Validation of Prognostic Scores Based on  
745 Admission Characteristics. *PLoS Med.* **5**, e165 (2008).

746 6. Stocchetti, N. *et al.* Severe traumatic brain injury: targeted management in the  
747 intensive care unit. *Lancet Neurol.* **16**, 452-464 (2017).

748 7. Wang, K. K. W., Moghieb, A., Yang, Z. & Zhang, Z. Systems biomarkers as acute  
749 diagnostics and chronic monitoring tools for traumatic brain injury in *Proc. SPIE*  
750 *8723: Sensing Technologies for Global Health, Military Medicine, and*  
751 *Environmental Monitoring III* (ed. Southern, S. O.) 87230O (Society of Photo-  
752 Optical Instrumentation Engineers, 2013).

753 8. Alkhachroum, A., Terilli, K., Megjhani, M. & Park, S. Harnessing Big Data in  
754 Neurocritical Care in the Era of Precision Medicine. *Curr. Treat. Options Neurol.*  
755 **22**, 15 (2020).

756 9. Fidali, B. C., Stevens, R. D. & Claassen, J. Novel approaches to prediction in  
757 severe brain injury. *Curr. Opin. Neurol.* **33**, 669-675 (2020).

758 10. Winters, J. M. & Crago, P. E. (eds.) *Biomechanics and neural control of posture*  
759 *and movement* (Springer, 2000).

760 11. Shadmehr, R. & Krakauer, J. W. A computational neuroanatomy for motor  
761 control. *Exp. Brain Res.* **185**, 359-381 (2008).

762 12. Reinkensmeyer, D. J. *et al.* Computational neurorehabilitation: modeling plasticity  
763 and learning to predict recovery. *J. Neuroeng. Rehabil.* **13**, 42 (2016).

764 13. Olkowski, B. F. & Shah, S. O. Early Mobilization in the Neuro-ICU: How Far Can  
765 We Go? *Neurocrit. Care* **27**, 141-150 (2017).

766 14. Drummond, M. J. *et al.* Short-term bed rest increases TLR4 and IL-6 expression  
767 in skeletal muscle of older adults. *Am. J. Physiol. Regul. Integr. Comp. Physiol.*  
768 **305**, 216 (2013).

769 15. Parry, S. M. & Puthuchery, Z. A. The impact of extended bed rest on the  
770 musculoskeletal system in the critical care environment. *Extrem. Physiol. Med.* **4**,  
771 16 (2015).

772 16. Topp, R., Ditmyer, M., King, K., Doherty, K. & Hornyak, J. The effect of bed rest  
773 and potential of prehabilitation on patients in the intensive care unit. *AACN Clin.*  
774 *Issues* **13**, 263-276 (2002).



- 775 17. Bloomfield, S. A. Changes in musculoskeletal structure and function with  
776 prolonged bed rest. *Med. Sci. Sports Exerc.* **29**, 197-206 (1997).
- 777 18. Fowles, J. R., Sale, D. G. & MacDougall, J. D. Reduced strength after passive  
778 stretch of the human plantarflexors. *J. Appl. Physiol.* (1985) **89**, 1179-1188  
779 (2000).
- 780 19. Bahouth, M. N. *et al.* Safety and Feasibility of a Neuroscience Critical Care  
781 Program to Mobilize Patients With Primary Intracerebral Hemorrhage. *Arch.*  
782 *Phys. Med. Rehabil.* **99**, 1220-1225 (2018).
- 783 20. Preece, S. J. *et al.* Activity identification using body-mounted sensors--a review of  
784 classification techniques. *Physiol. Meas.* **30**, 1 (2009).
- 785 21. Adrian, M. & Cooper, J. M. *Biomechanics of human movement* (Brown &  
786 Benchmark, 1995).
- 787 22. Mathie, M. J., Coster, A. C., Lovell, N. H. & Celler, B. G. Accelerometry: providing  
788 an integrated, practical method for long-term, ambulatory monitoring of human  
789 movement. *Physiol. Meas.* **25**, 1 (2004).
- 790 23. Bouten, C. V., Koekkoek, K. T., Verduin, M., Kodde, R. & Janssen, J. D. A triaxial  
791 accelerometer and portable data processing unit for the assessment of daily  
792 physical activity. *IEEE Trans. Biomed. Eng.* **44**, 136-147 (1997).
- 793 24. Moe-Nilssen, R. Test-retest reliability of trunk accelerometry during standing and  
794 walking. *Arch. Phys. Med. Rehabil.* **79**, 1377-1385 (1998).
- 795 25. Hansson, G. A., Asterland, P., Holmer, N. G. & Skerfving, S. Validity and  
796 reliability of triaxial accelerometers for inclinometry in posture analysis. *Med. Biol.*  
797 *Eng. Comput.* **39**, 405-413 (2001).
- 798 26. Meijer, G. A., Westerterp, K. R., Verhoeven, F. M., Koper, H. B. & ten Hoor, F.  
799 Methods to assess physical activity with special reference to motion sensors and  
800 accelerometers. *IEEE Trans. Biomed. Eng.* **38**, 221-229 (1991).
- 801 27. Verceles, A. C. & Hager, E. R. Use of Accelerometry to Monitor Physical Activity  
802 in Critically Ill Subjects: A Systematic Review. *Respir. Care* **60**, 1330-1336  
803 (2015).
- 804 28. Moher, D., Schulz, K. F. & Altman, D. G. The CONSORT Statement: Revised  
805 Recommendations for Improving the Quality of Reports of Parallel-Group  
806 Randomized Trials. *Ann. Intern. Med.* **134**, 657-662 (2001).
- 807 29. Teasdale, G. & Jennett, B. Assessment of coma and impaired consciousness. A  
808 practical scale. *Lancet* **2**, 81-84 (1974).
- 809 30. Teasdale, G. *et al.* The Glasgow Coma Scale at 40 years: standing the test of  
810 time. *Lancet Neurol.* **13**, 844-854 (2014).
- 811 31. Austin, P. C. & Steyerberg, E. W. The Integrated Calibration Index (ICI) and  
812 related metrics for quantifying the calibration of logistic regression models. *Stat.*  
813 *Med.* **38**, 4051-4065 (2019).
- 814 32. Lugade, V., Fortune, E., Morrow, M. & Kaufman, K. Validity of using tri-axial  
815 accelerometers to measure human movement—Part I: Posture and movement  
816 detection. *Med. Eng. Phys.* **36**, 169-176 (2014).

- 817 33. Jordao, A., Torres, L. A. B. & Schwartz, W. R. Novel approaches to human  
818 activity recognition based on accelerometer data. *Signal Image Video Process.*  
819 **12**, 1387-1394 (2018).
- 820 34. Ignatov, A. Real-time human activity recognition from accelerometer data using  
821 Convolutional Neural Networks. *Appl. Soft. Comput.* **62**, 915-922 (2018).
- 822 35. Migueles, J. H. *et al.* Accelerometer Data Collection and Processing Criteria to  
823 Assess Physical Activity and Other Outcomes: A Systematic Review and  
824 Practical Considerations. *Sports Med.* **47**, 1821-1845 (2017).
- 825 36. Fazio, S. *et al.* Quantifying Mobility in the ICU: Comparison of Electronic Health  
826 Record Documentation and Accelerometer-Based Sensors to Clinician-Annotated  
827 Video. *Crit. Care Explor.* **2** (2020).
- 828 37. Montoye, A. H. K., Moore, R. W., Bowles, H. R., Korycinski, R. & Pfeiffer, K. A.  
829 Reporting accelerometer methods in physical activity intervention studies: a  
830 systematic review and recommendations for authors. *Br. J. Sports Med.* **52**,  
831 1507-1516 (2018).
- 832 38. Kanai, M. *et al.* Effect of accelerometer-based feedback on physical activity in  
833 hospitalized patients with ischemic stroke: a randomized controlled trial. *Clin.*  
834 *Rehabil.* **32**, 1047-1056 (2018).
- 835 39. Grimes, L., Outtrim, J. G., Griffin, S. J. & Ercole, A. Accelerometry as a measure  
836 of modifiable physical activity in high-risk elderly preoperative patients: a  
837 prospective observational pilot study. *BMJ Open* **9**, e032346 (2019).
- 838 40. Stienen, M. N. *et al.* Objective activity tracking in spine surgery: a prospective  
839 feasibility study with a low-cost consumer grade wearable accelerometer. *Sci.*  
840 *Rep.* **10**, 4939 (2020).
- 841 41. Lovejoy, C. A., Buch, V. & Maruthappu, M. Artificial intelligence in the intensive  
842 care unit. *Crit. Care* **23**, 7-9 (2019).
- 843 42. Gholami, B., Haddad, W. M. & Bailey, J. M. AI in the ICU: In the intensive care  
844 unit, artificial intelligence can keep watch. *IEEE Spectr.* **55**, 31-35 (2018).
- 845 43. Halpern, N. A., Pastores, S. M., Oropello, J. M. & Kvetan, V. Critical Care  
846 Medicine in the United States: Addressing the Intensivist Shortage and Image of  
847 the Specialty\*. *Crit. Care Med.* **41** (2013).
- 848 44. Reith, F. C., Brennan, P. M., Maas, A. I. & Teasdale, G. M. Lack of  
849 Standardization in the Use of the Glasgow Coma Scale: Results of International  
850 Surveys. *J. Neurotrauma* **33**, 89-94 (2016).
- 851 45. Reith, F. C., Van den Brande, R., Synnot, A., Gruen, R. & Maas, A. I. The  
852 reliability of the Glasgow Coma Scale: a systematic review. *Intensive Care Med.*  
853 **42**, 3-15 (2016).
- 854 46. Kean, J. & Malec, J. F. Towards a Better Measure of Brain Injury Outcome: New  
855 Measures or a New Metric? *Arch. Phys. Med. Rehabil.* **95**, 1225-1228 (2014).
- 856 47. Wilson, J. T., Pettigrew, L. E. & Teasdale, G. M. Structured interviews for the  
857 Glasgow Outcome Scale and the extended Glasgow Outcome Scale: guidelines  
858 for their use. *J. Neurotrauma* **15**, 573-585 (1998).

- 859 48. van Hees, V. T. *et al.* Separating movement and gravity components in an  
860 acceleration signal and implications for the assessment of human daily physical  
861 activity. *PLoS One* **8**, e61691 (2013).
- 862 49. Box, G. E. P. & Cox, D. R. An Analysis of Transformations. *J. R. Stat. Soc. Series*  
863 *B Stat. Methodol.* **26**, 211-243 (1964).
- 864 50. Honaker, J., King, G., Blackwell, M. Amelia II: A Program for Missing Data. *J. Stat.*  
865 *Softw.* **45** (2011).
- 866 51. R Core Team. R: A Language and Environment for Statistical Computing. **4.0.0**  
867 (2020).
- 868 52. Rubin, D. B. Inference and missing data. *Biometrika* **63**, 581-592 (1976).
- 869 53. Kuhn, M. Building Predictive Models in R Using the caret Package. *J. Stat. Softw.*  
870 **28** (2008).
- 871 54. Vogelstein, J. T. *et al.* Geometric Dimensionality Reduction for Subsequent  
872 Classification. Preprint at <https://arxiv.org/abs/1709.01233> (2017).
- 873 55. Yeo, I. & Johnson, R. A. A new family of power transformations to improve  
874 normality or symmetry. *Biometrika* **87**, 954-959 (2000).
- 875 56. Harrell, F. E., Jr. *Regression Modeling Strategies* (Springer, 2015).
- 876 57. Tsamardinos, I., Greasidou, E. & Borboudakis, G. Bootstrapping the out-of-  
877 sample predictions for efficient and accurate cross-validation. *Mach. Learning*  
878 **107**, 1895-1922 (2018).
- 879 58. Bhattacharyay, S., Wang, M. & Joshi, E. sbhattacharyay/nims: Neurological Injury  
880 Motion Sensing (NIMS) Project Repository. *GitHub v1.0.2*;  
881 [10.5281/zenodo.4765305](https://zenodo.org/record/4765305) (2021).
- 882 59. Mathie, M. J., Coster, A. C., Lovell, N. H. & Celler, B. G. Detection of daily  
883 physical activities using a triaxial accelerometer. *Med. Biol. Eng. Comput.* **41**,  
884 296-301 (2003).
- 885 60. Fahrenberg, J., Foerster, F., Smeja, M. & Muller, W. Assessment of posture and  
886 motion by multichannel piezoresistive accelerometer recordings.  
887 *Psychophysiology* **34**, 607-612 (1997).
- 888 61. Foerster, F. & Fahrenberg, J. Motion pattern and posture: correctly assessed by  
889 calibrated accelerometers. *Behav. Res. Methods Instrum. Comput.* **32**, 450-457  
890 (2000).
- 891 62. Bao, L. & Intille, S. S. Activity Recognition from User-Annotated Acceleration  
892 Data in *Pervasive Computing: Proceedings of the Second International*  
893 *Conference of PERVASIVE* (eds. Ferscha, A. & Mattern, F.) 1-17 (Springer,  
894 2004).
- 895 63. Sugimoto, A., Hara, Y., Findley, T. W. & Yoncmoto, K. A useful method for  
896 measuring daily physical activity by a three-direction monitor. *Scand. J. Rehabil.*  
897 *Med.* **29**, 37-42 (1997).
- 898 64. Wang, N., Ambikairajah, E., Lovell, N. H. & Celler, B. G. Accelerometry Based  
899 Classification of Walking Patterns Using Time-frequency Analysis in *Proceedings*  
900 *of the 29th Annual International Conference of the IEEE Engineering in Medicine*  
901 *and Biology Society* (Institute of Electrical and Electronics Engineers, 2007).

902 **FIGURE LEGENDS**

903

904 **Fig. 1. Accelerometry processing and feature extraction pipeline and**  
905 **experimental paradigm.** **a** Accelerometry (top right, units:  $g$ ) was continuously  
906 captured from wearable sensors placed on six joints of severe brain injury patients ( $n$   
907 = 69) in the ICU (top left) for a median of 24 (IQR: 23 - 25) hours per patient. Sensor  
908 placement acronyms correspond to the right and left elbows (RE and LE), the right  
909 and left wrists (RW and LW), and the right and left ankles (RA and LE).  $f_s$  represents  
910 the sampling rate of accelerometry in Hz. The raw accelerometry collected from each  
911 patient underwent a four-step (numbered boxes) preprocessing pipeline before being  
912 transformed into a complete, multiply imputed ( $m = 9$ ) feature set for analysis.  
913 Feature type acronyms are decoded in **Table 3**, and the steps of the processing and  
914 extraction pipeline are described in the **Methods** section. **b** Experimental paradigm  
915 to derive model probabilities for motor function detection per the motor component  
916 score of the Glasgow Coma Scale (GCS<sub>m</sub>) and functional outcome predictions per  
917 the Glasgow Outcome Scale – Extended (GOSE). GCS<sub>m</sub> evaluations were reported  
918 in the patients' electronic health records by ICU clinicians and may have occurred at  
919 any time during ICU stay (red, upside-down triangle). We tested 19 distinct  
920 observation windows (light-blue, shaded regions), ranging from 3 minutes to 24  
921 hours (**Supplementary Table S1 online**). The motion feature time-series (end of  
922 pipeline in **a**) in the observation window preceding each GCS<sub>m</sub> evaluation  
923 underwent two more processing steps: (1) the calculation and addition of another  
924 feature representing the proportion of dynamic activity (PDA) of each sensor in the  
925 observation window, and (2) supervised dimensionality reduction, in which a linear  
926 optimal low-rank projection (LOL) matrix is learned from the training set to exploit the  
927 variance in the dataset, stratified by model endpoint, and output the best-  
928 discriminating low ( $d$ , from 2 to 20) dimensional vector (see **Methods**). These  
929 vectors were then used to (3) train logistic regression models that, on a threshold-  
930 level, detected the concurrent GCS<sub>m</sub> or predicted GOSE at hospital discharge or at  
931 12 months post discharge.

932

933 **Fig. 2. Discrimination performance of motor function detection models on**  
934 **validation sets.** **a** Receiver operating characteristic (ROC) curves of models  
935 pertaining to the observation windows with the highest achieved area under the ROC  
936 curve (AUC) per each detection threshold of the motor component score of the  
937 Glasgow Coma Scale (GCS<sub>m</sub>). AUC corresponds to the probability that the model  
938 can correctly discriminate a randomly selected patient above the threshold from a  
939 randomly selected patient below the threshold. Shaded areas are 95% confidence  
940 intervals derived using bias-corrected bootstrapping (1,000 resamples) to represent  
941 the variation across repeated cross-validation folds (5 repeats of 5 folds) and nine  
942 missing value imputations. The values in each box represent the observation window  
943 achieving the highest AUC as well as the corresponding mean AUC (with 95%  
944 confidence interval in parentheses). The diagonal dashed line represents the line of  
945 no discrimination (AUC = 0.5). **b** AUC vs. observation windows up to 30 minutes per  
946 each detection threshold of the motor component score of the Glasgow Coma Scale  
947 (GCS<sub>m</sub>). Points represent observation windows tested and error bars (with the  
948 associated shaded region) represent the 95% confidence interval. The horizontal  
949 dashed line corresponds to no discrimination (AUC = 0.5).

950



951 **Fig. 3. Discrimination performance of functional outcome at hospital discharge**  
952 **prediction models on validation sets. a** Receiver operating characteristic (ROC)  
953 curves of models pertaining to the observation windows with the highest achieved  
954 area under the ROC curve (AUC) per each tested prediction threshold of the  
955 Glasgow Outcome Scale – Extended (GOSE). AUC corresponds to the probability  
956 that the model can correctly discriminate a randomly selected patient above the  
957 threshold from a randomly selected patient below the threshold. Shaded areas are  
958 95% confidence intervals derived using bias-corrected bootstrapping (1,000  
959 resamples) to represent the variation across repeated cross-validation folds (5  
960 repeats of 5 folds) and nine missing value imputations. The values in each box  
961 represent the observation window achieving the highest AUC as well as the  
962 corresponding mean AUC (with 95% confidence interval in parentheses). The  
963 diagonal dashed line represents the line of no discrimination (AUC = 0.5). **b** AUC vs.  
964 observation windows up to 6 hours per each tested prediction threshold of the  
965 Glasgow Outcome Scale – Extended (GOSE). Points represent observation windows  
966 tested and error bars (with the associated shaded region) represent the 95%  
967 confidence interval. The horizontal dashed line corresponds to no discrimination  
968 (AUC = 0.5).

969  
970 **Fig. 4. Feature significance matrices of optimally discriminating motor function**  
971 **detection and functional outcome prediction models.** Significance scores are  
972 calculated by weighting linear optimal low-rank projection (LOL) coefficients of  
973 sensor-feature type combinations – which represent the relative importance of each  
974 timestep of each sensor-feature type combination in explaining the variance in the  
975 dataset stratified by (a) the motor component score of the Glasgow Coma Scale  
976 (GCSm) or (b) the Glasgow Outcome Scale – Extended (GOSE) – by the logistic  
977 regression coefficients of the corresponding LOL component in the low-dimensional  
978 vector (**Fig. 1b**). The higher (yellow) the mean significance score, the greater the  
979 combination of that sensor-feature type combination in the learned discrimination of  
980 patients at that threshold. The feature significance matrix in (a) corresponds to the  
981 optimally discriminating model configuration (6-hour observation window) for  
982 detection of GCSm > 4 (**Fig. 2a**) while the matrix in (b) corresponds to the optimally  
983 discriminating model configuration (6-hour observation window) for prediction of  
984 GOSE > 5 at hospital discharge (**Fig. 3a**). Mean significance scores (across all  
985 timesteps for a sensor-feature type combination) are listed as well as 95%  
986 confidence intervals bootstrapped from 1,000 resamples to represent the variation  
987 across repeated cross-validation folds (5 repeats of 5 folds) and nine missing value  
988 imputations. Sensor placement acronyms correspond to joints shown in **Fig. 1** and  
989 feature type acronyms are decoded in **Table 3**.

990  
991 **Fig. 5. Retrospective case study analysis of accelerometry-based detection of**  
992 **motor function in six patients who experienced relevant transition.** The red and  
993 blue lines correspond to the predicted probabilities returned every 10 minutes by  
994 models trained on all other patients on short (27 minutes) and long (6 hours)  
995 observation windows respectively. The predictions from the shorter observation  
996 window (red line) respond quicker to transient changes in the motor component  
997 score of the Glasgow Coma Scale (GCSm) (e.g., Case No. 2) while the predictions  
998 from the longer observation window (blue line) responds with greater stability to  
999 persistent GCSm transitions (e.g., Case No. 6). Shaded areas are 95% confidence  
1000 intervals derived using bootstrapping (10,000 resamples) to represent the variation



1001 across nine missing value imputations. Upward triangle markers designate  $GCSm >$   
1002 4 while downward triangle markers designate  $GCSm \leq 4$ .

1003 **TABLES**

1004 **Table 1. Study population characteristics.**

| Characteristic                                                                            | Severe brain injury patients (n = 69)                |
|-------------------------------------------------------------------------------------------|------------------------------------------------------|
| Age (y)                                                                                   | 59 (48–70)                                           |
| M/F (n)                                                                                   | 33/36                                                |
| Types of severe brain injury (n)                                                          |                                                      |
| Intracranial hemorrhage (ICH)                                                             | 29 (42.03%)                                          |
| Subdural or epidural hematoma (SDH/EDH)                                                   | 18 (26.09%)                                          |
| Subarachnoid hemorrhage (SAH)                                                             | 17 (24.64%)                                          |
| Cerebrovascular accident (CVA)                                                            | 14 (20.29%)                                          |
| Brain tumor (BT)                                                                          | 12 (17.39%)                                          |
| Traumatic brain injury (TBI)                                                              | 8 (11.59%)                                           |
| Motor component score of the Glasgow Coma Scale (GCSm) at ICU admission                   |                                                      |
| (1) No response                                                                           | 4 (5.80%)                                            |
| (2) Abnormal extension                                                                    | 3 (4.35%)                                            |
| (3) Abnormal flexion                                                                      | 6 (8.70%)                                            |
| (4) Withdrawal from stimulus                                                              | 4 (5.80%)                                            |
| (5) Movement localized to stimulus                                                        | 17 (24.64%)                                          |
| (6) Obeys commands                                                                        | 35 (50.72%)                                          |
| Motor component score of the Glasgow Coma Scale (GCSm) at ICU discharge                   |                                                      |
| (1) No response                                                                           | 7 (10.14%)                                           |
| (2) Abnormal extension                                                                    | 5 (7.25%)                                            |
| (3) Abnormal flexion                                                                      | 4 (5.80%)                                            |
| (4) Withdrawal from stimulus                                                              | 4 (5.80%)                                            |
| (5) Movement localized to stimulus                                                        | 11 (15.94%)                                          |
| (6) Obeys commands                                                                        | 38 (55.07%)                                          |
| Net change in GCSm during ICU stay                                                        | 0 (0–+1)                                             |
| Glasgow Outcome Scale - Extended (GOSE) at hospital discharge                             |                                                      |
| (1) Dead                                                                                  | 16 (23.19%)                                          |
| (2) Vegetative state                                                                      | 4 (5.80%)                                            |
| (3) Lower severe disability                                                               | 30 (43.48%)                                          |
| (4) Upper severe disability                                                               | 11 (15.94%)                                          |
| (5) Lower moderate disability                                                             | 6 (8.70%)                                            |
| (6) Upper moderate disability                                                             | 1 (1.45%)                                            |
| (7) Lower good recovery                                                                   | 1 (1.45%)                                            |
| (8) Upper good recovery                                                                   | 0 (0%)                                               |
| Glasgow Outcome Scale - Extended (GOSE) at 12 months post discharge*                      |                                                      |
| (1) Dead                                                                                  | 28 (43.75%)                                          |
| (2) Vegetative state                                                                      | 2 (3.12%)                                            |
| (3) Lower severe disability                                                               | 14 (21.88%)                                          |
| (4) Upper severe disability                                                               | 12 (18.75%)                                          |
| (5) Lower moderate disability                                                             | 3 (4.69%)                                            |
| (6) Upper moderate disability                                                             | 0 (0%)                                               |
| (7) Lower good recovery                                                                   | 3 (4.69%)                                            |
| (8) Upper good recovery                                                                   | 2 (3.12%)                                            |
| Net change in GOSE in 12 months post discharge*                                           | 0 (-3.425–+3)                                        |
| Acute Physiology and Chronic Health Evaluation (APACHE) II at 24 hours post ICU admission | Score (0–71)                                         |
|                                                                                           | 21 (16–25)                                           |
|                                                                                           | Predicted risk of in-hospital mortality (%)          |
|                                                                                           | 46.00 (29.30–67.00)                                  |
|                                                                                           | Accuracy of in-hospital mortality prediction         |
|                                                                                           | 0.70                                                 |
|                                                                                           | AUC <sup>†</sup> of in-hospital mortality prediction |
|                                                                                           | 0.84                                                 |
| Length of stay in ICU (d)                                                                 | 19 (11–29)                                           |
| Delay between ICU discharge and recording start (d)                                       | 7 (2–15)                                             |
| Recording duration (h)                                                                    | 24.09 (22.81–25.11)                                  |
| Percentage of ICU stay recorded (%)                                                       | 5.54 (3.13–8.51)                                     |
| Percentage of ICU stay elapsed before recording start (%)                                 | 43.53 (24.98–62.88)                                  |
| Recording duration (h)                                                                    | 24.09 (22.81–25.11)                                  |

1005 Values represent medians with interquartile ranges (Q1–Q3) in parentheses or  
 1006 counts with percentages (%) in parentheses.

1007 \*Total sample size at 12 months post discharge is n = 64.

1008 †Area under the receiver operating characteristic curve, i.e., the probability that the  
 1009 predicted mortality risk of a randomly chosen patient who died is greater than the  
 1010 predicted mortality risk of a randomly chosen patient who survived hospital stay.

1011 **Table 2.** Classification performance metrics of optimally discriminating models.

| Task                                           | Threshold | <i>n</i> *        | Accuracy            | Precision           | Recall (Sensitivity) | Specificity         | F <sub>1</sub> score |
|------------------------------------------------|-----------|-------------------|---------------------|---------------------|----------------------|---------------------|----------------------|
| Detection of GCSm                              | GCSm > 1  | 15/244<br>(0.94)  | 0.91<br>(0.84–0.97) | 0.93<br>(0.86–0.99) | 0.97<br>(0.95–0.99)  | 0.03<br>(0.00–0.10) | 0.95<br>(0.91–0.98)  |
|                                                | GCSm > 2  | 84/480<br>(0.85)  | 0.83<br>(0.70–0.94) | 0.86<br>(0.73–0.97) | 0.96<br>(0.94–0.99)  | 0.15<br>(0.01–0.35) | 0.90<br>(0.83–0.96)  |
|                                                | GCSm > 3  | 175/424<br>(0.71) | 0.69<br>(0.57–0.80) | 0.75<br>(0.59–0.90) | 0.83<br>(0.74–0.90)  | 0.44<br>(0.28–0.64) | 0.79<br>(0.68–0.88)  |
|                                                | GCSm > 4  | 166/322<br>(0.66) | 0.71<br>(0.59–0.83) | 0.76<br>(0.59–0.90) | 0.79<br>(0.66–0.91)  | 0.54<br>(0.36–0.73) | 0.78<br>(0.67–0.87)  |
|                                                | GCSm > 5  | 344/255<br>(0.57) | 0.63<br>(0.53–0.72) | 0.59<br>(0.38–0.81) | 0.58<br>(0.45–0.69)  | 0.75<br>(0.60–0.89) | 0.54<br>(0.40–0.66)  |
| Prediction of GOSE at hospital discharge       | GOSE > 1  | 120/368<br>(0.75) | 0.69<br>(0.57–0.81) | 0.77<br>(0.61–0.92) | 0.87<br>(0.79–0.94)  | 0.30<br>(0.13–0.50) | 0.81<br>(0.70–0.90)  |
|                                                | GOSE > 2  | 89/245<br>(0.73)  | 0.66<br>(0.52–0.79) | 0.74<br>(0.56–0.89) | 0.82<br>(0.71–0.92)  | 0.23<br>(0.03–0.44) | 0.78<br>(0.66–0.87)  |
|                                                | GOSE > 3  | 451/198<br>(0.69) | 0.64<br>(0.53–0.75) | 0.35<br>(0.13–0.55) | 0.24<br>(0.13–0.35)  | 0.84<br>(0.78–0.90) | 0.28<br>(0.15–0.39)  |
|                                                | GOSE > 4  | 567/77<br>(0.88)  | 0.84<br>(0.73–0.93) | 0.12<br>(0.00–0.35) | 0.11<br>(0.01–0.24)  | 0.96<br>(0.92–0.98) | 0.11<br>(0.01–0.23)  |
|                                                | GOSE > 5  | 479/9<br>(0.98)   | 0.97<br>(0.95–0.99) | 0.00<br>(0.00–0.00) | 0.00<br>(0.00–0.00)  | 0.99<br>(0.98–1.00) | 0.00<br>(0.00–0.00)  |
| Prediction of GOSE at 12 months post discharge | GOSE > 1  | 270/339<br>(0.56) | 0.54<br>(0.45–0.64) | 0.58<br>(0.38–0.78) | 0.62<br>(0.48–0.73)  | 0.45<br>(0.33–0.57) | 0.60<br>(0.46–0.72)  |
|                                                | GOSE > 2  | 288/329<br>(0.53) | 0.51<br>(0.43–0.59) | 0.54<br>(0.35–0.72) | 0.59<br>(0.50–0.69)  | 0.47<br>(0.35–0.59) | 0.54<br>(0.39–0.66)  |
|                                                | GOSE > 3  | 390/203<br>(0.66) | 0.57<br>(0.47–0.66) | 0.34<br>(0.14–0.55) | 0.33<br>(0.21–0.44)  | 0.80<br>(0.72–0.87) | 0.32<br>(0.18–0.46)  |
|                                                | GOSE > 4  | 488/105<br>(0.82) | 0.76<br>(0.63–0.87) | 0.12<br>(0.01–0.29) | 0.11<br>(0.03–0.24)  | 0.92<br>(0.87–0.96) | 0.08<br>(0.01–0.18)  |
|                                                | GOSE > 5  | 538/70<br>(0.88)  | 0.85<br>(0.74–0.93) | 0.15<br>(0.00–0.42) | 0.10<br>(0.02–0.29)  | 0.96<br>(0.93–0.98) | 0.12<br>(0.02–0.28)  |
|                                                | GOSE > 6  | 538/70<br>(0.88)  | 0.84<br>(0.72–0.93) | 0.15<br>(0.00–0.44) | 0.07<br>(0.01–0.17)  | 0.96<br>(0.93–0.99) | 0.09<br>(0.00–0.19)  |
|                                                | GOSE > 7  | 591/24<br>(0.96)  | 0.94<br>(0.92–0.96) | 0.04<br>(0.00–0.12) | 0.03<br>(0.02–0.04)  | 0.99<br>(0.96–0.99) | 0.02<br>(0.00–0.06)  |

1012 Classification metrics [mean (95% confidence interval)] corresponding to models  
 1013 trained on observation windows that maximize the area under the receiver operating  
 1014 characteristic curve (AUC) for each threshold (**Fig. 2a, 3a, and Supplementary Fig.**  
 1015 **S5 online**). Confidence intervals were derived using bias-corrected bootstrapping  
 1016 (1,000 resamples) and represent the variation across repeated cross-validation folds  
 1017 (5 repeats of 5 folds) and nine missing value imputations. Acronyms: motor  
 1018 component score of the Glasgow Coma Scale (GCSm) and Glasgow Outcome Scale  
 1019 – Extended (GOSE).  
 1020 \*Count distribution of negative vs. positive cases with the proportion of the most  
 1021 represented case, equivalent to the no information rate, in parentheses.

1022 **Table 3. Overview of extracted motion feature types.**

| Acronym | Feature description                                                           | Domain    | Reference |
|---------|-------------------------------------------------------------------------------|-----------|-----------|
| PDA     | Proportion of dynamic activity ( $SMA \geq 0.135g$ ) in observation window    | Time      | [32]      |
| SMA     | Signal magnitude area                                                         | Time      | [59]      |
| HLF (h) | Median of high-pass-filtered (4th-order Butterworth, $f_c = 2.5$ Hz) signal   | Time      | [60]      |
| HLF (l) | Median of low-pass-filtered (4th-order Butterworth, $f_c = 2.5$ Hz) signal    | Time      |           |
| MFR     | Median frequency according to Fourier transform coefficients                  | Frequency | [61]      |
| FDE     | Frequency-domain entropy                                                      | Frequency | [62]      |
| BPW     | Band power between 0.3 and 3.5 Hz                                             | Frequency | [63]      |
| WVL     | Level 2 – 6 detail coefficients of the 5th-order Daubechies wavelet transform | Wavelets  | [64]      |

1023 Each feature, except PDA, was extracted from non-overlapping 5 second windows  
1024 and root-sum-of-squares leveled across the three axes of accelerometry  
1025 measurement (x, y, z). A single PDA value was calculated per each sensor for the  
1026 entire observation window.  $f_c$  represents the critical frequency of the Butterworth  
1027 filter. The references point to original works in which the features (or similar variants)  
1028 were used in physical activity recognition. Explicit formulae for each feature can be  
1029 found in **Methods**.

a)

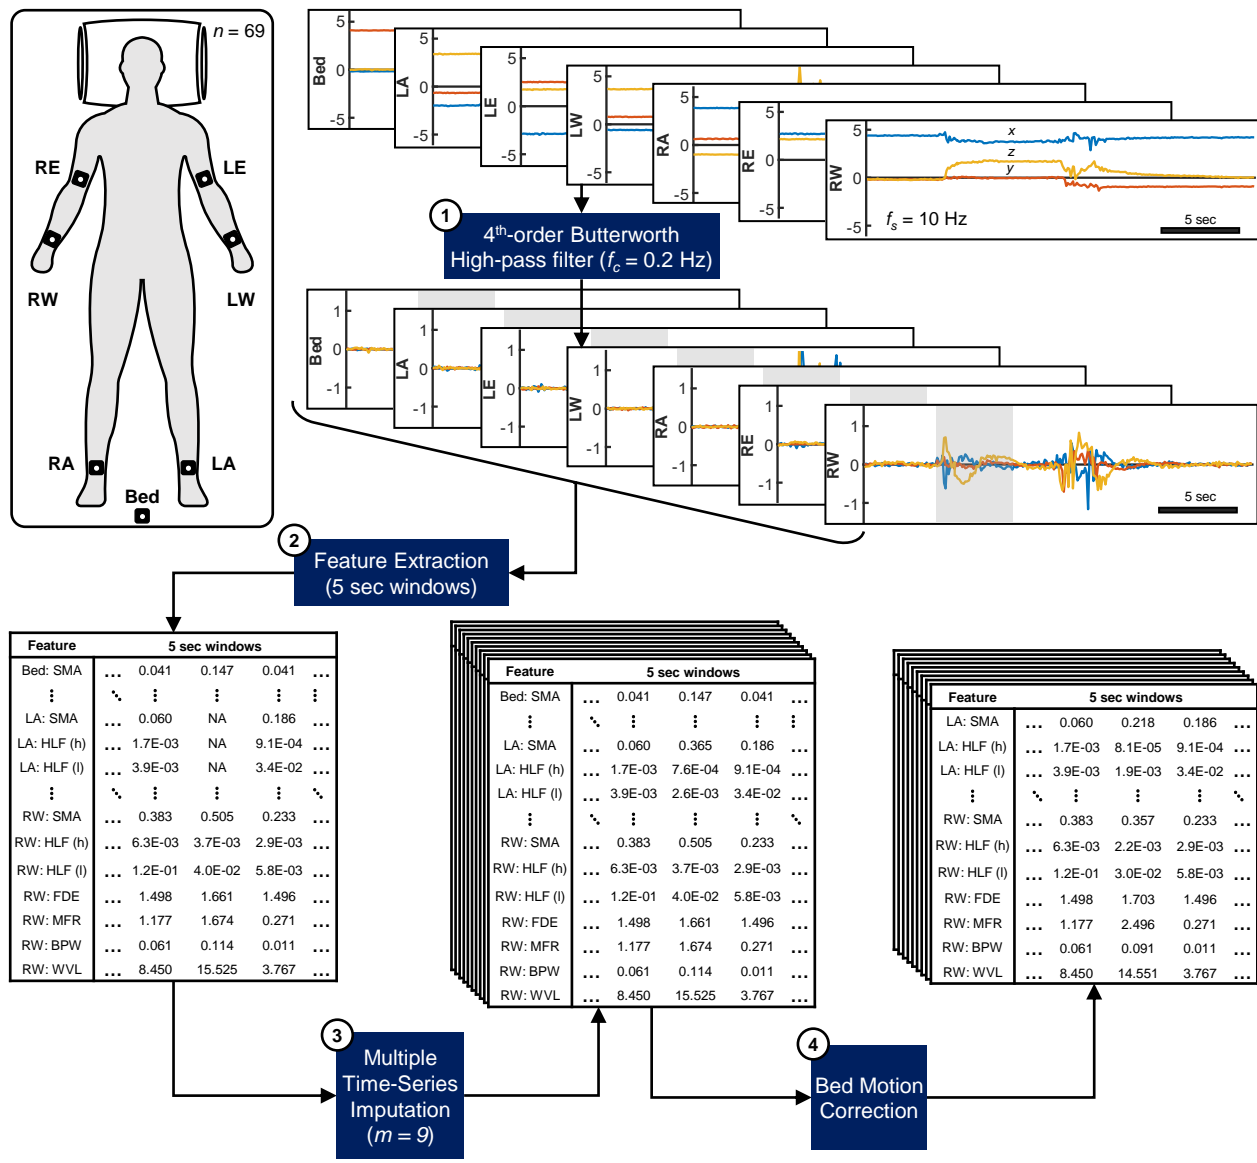

b)

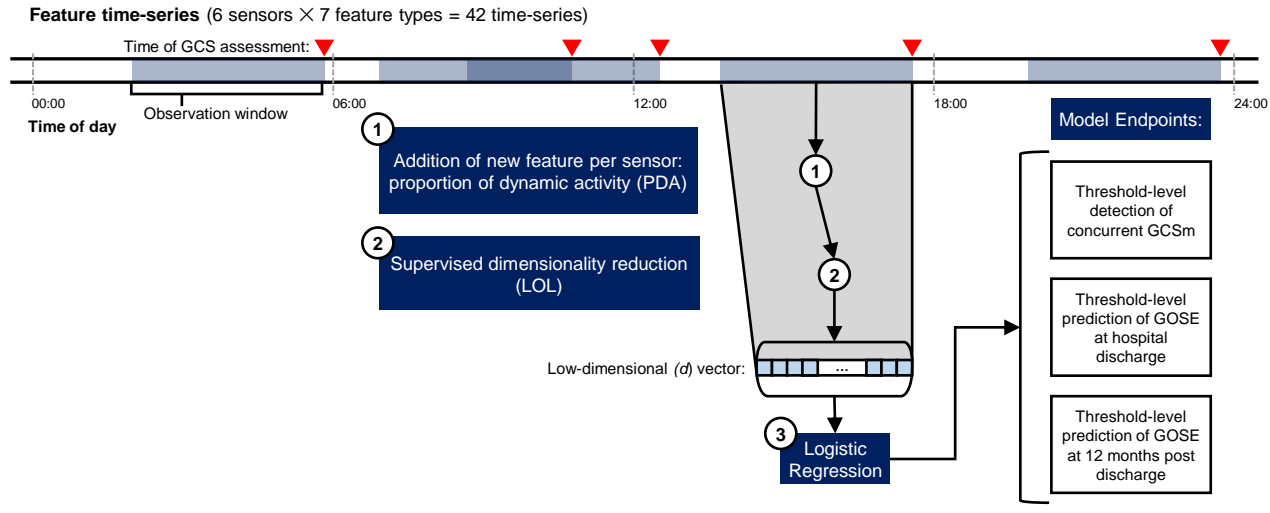



**a)**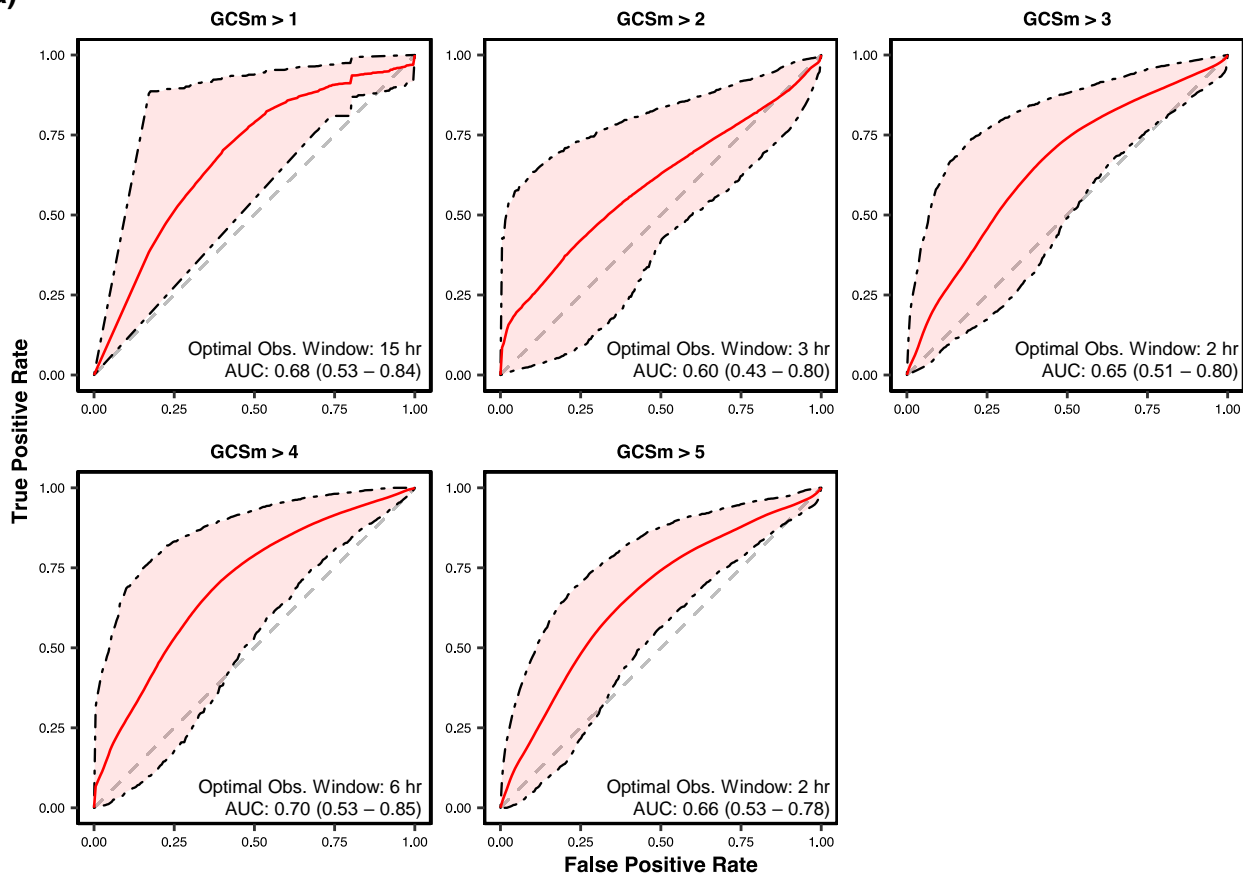**b)**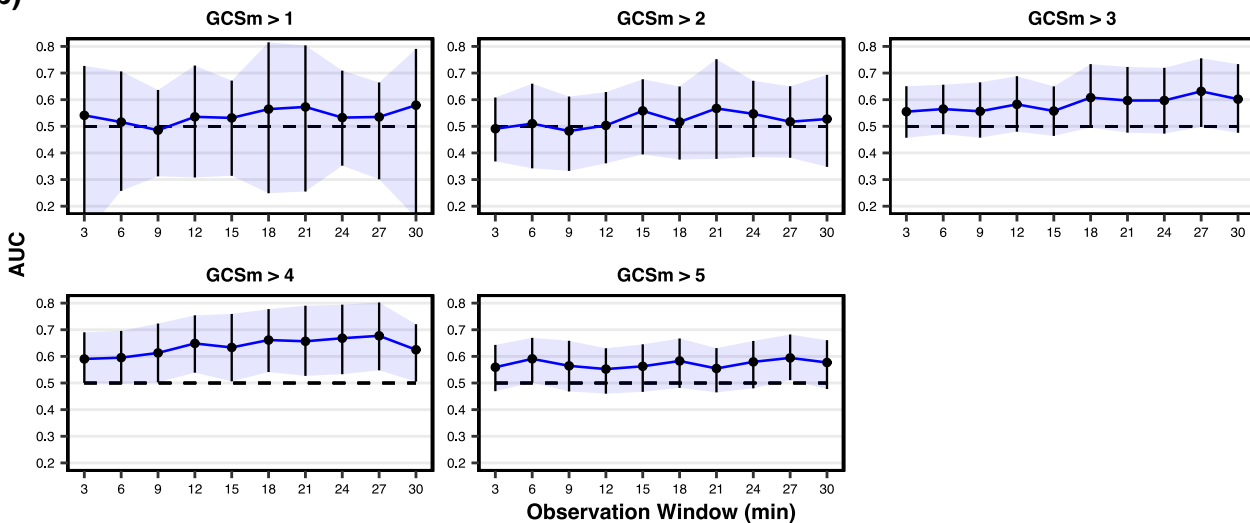

a)

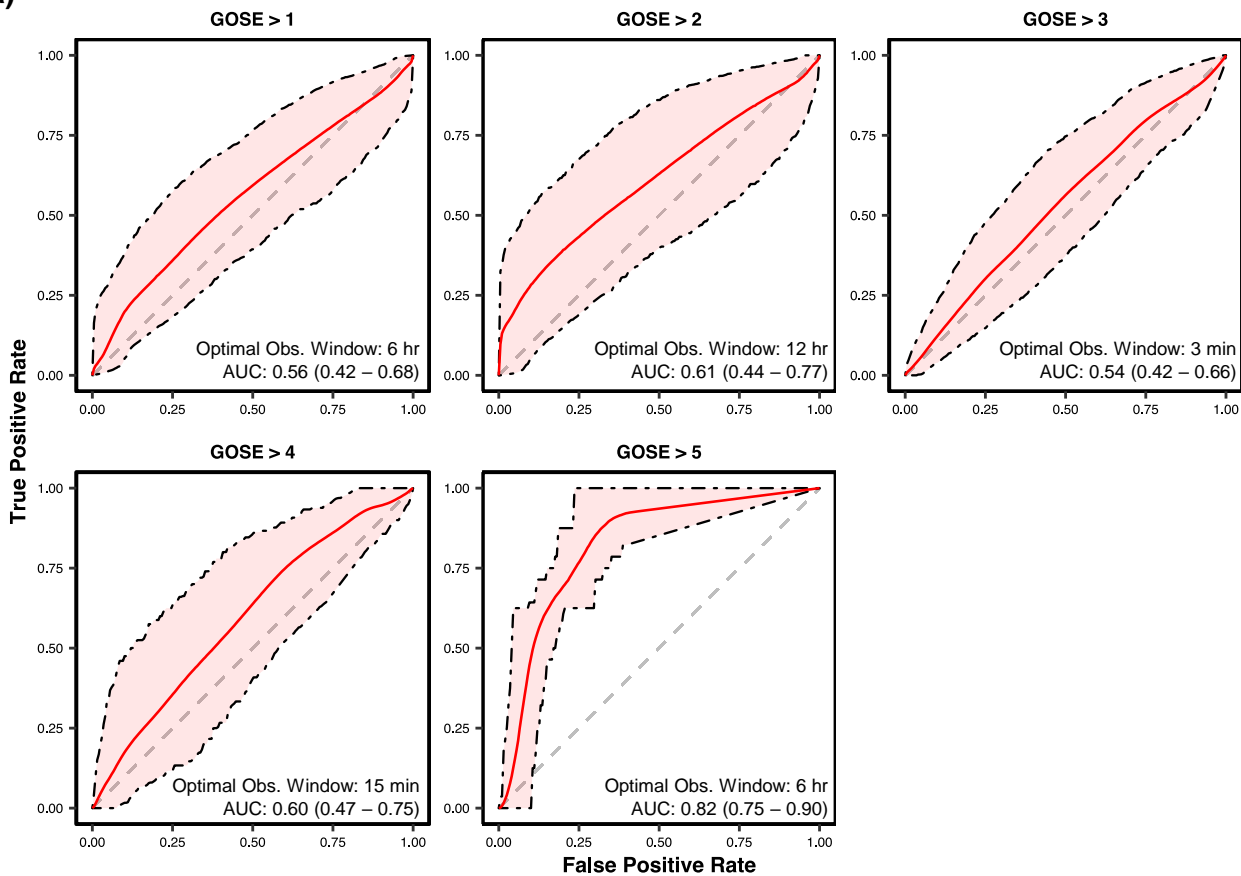

b)

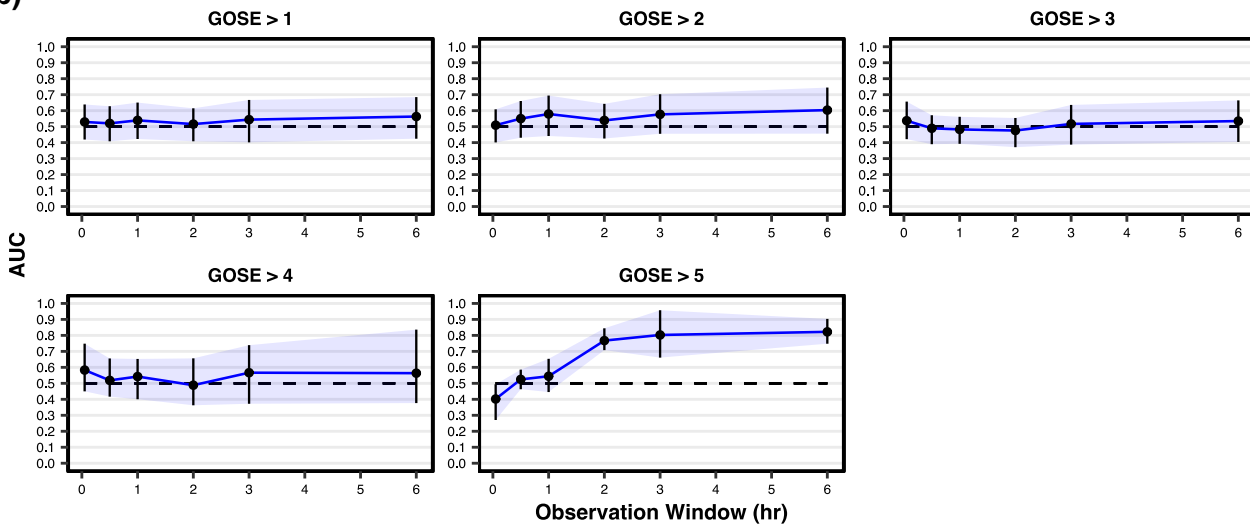

a)

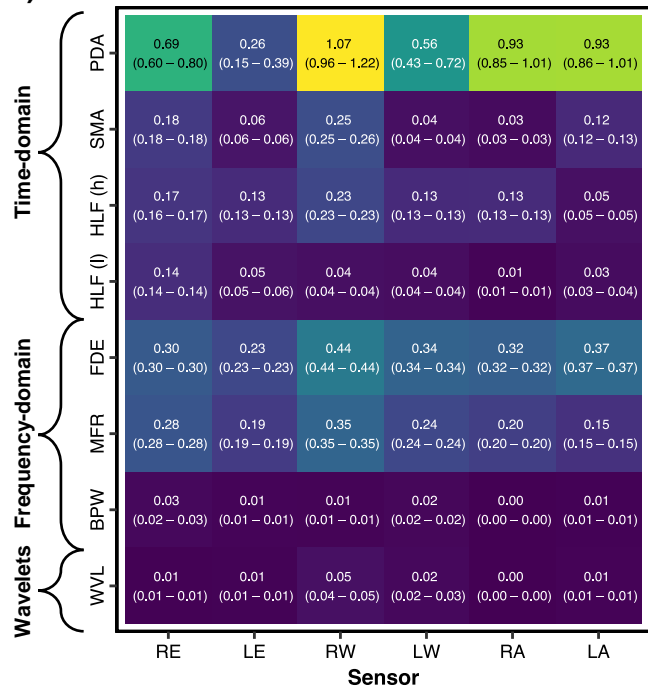

b)

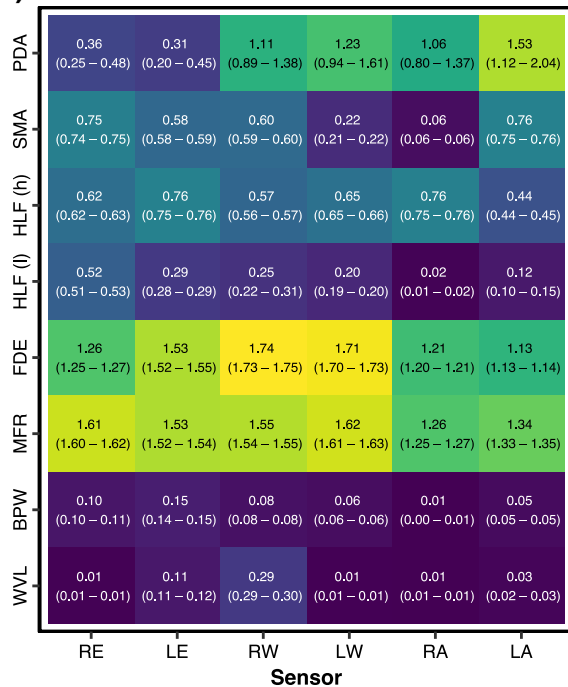

Case No. 1

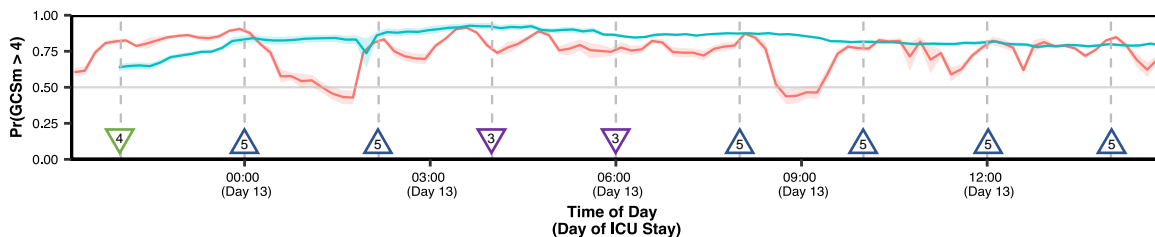

Case No. 2

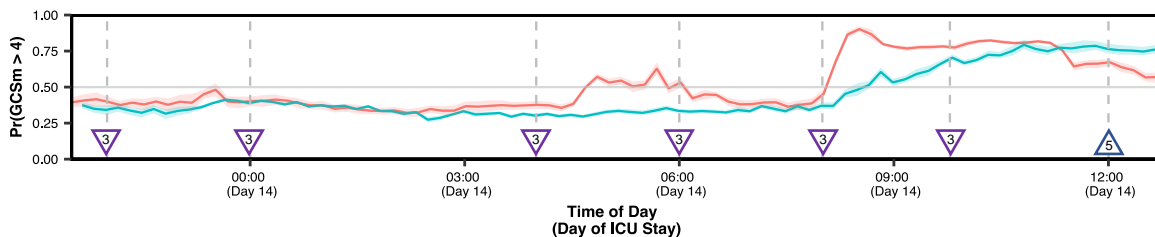

Case No. 3

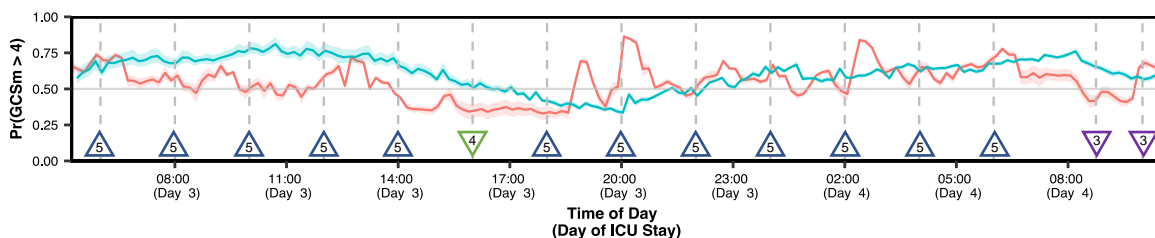

Case No. 4

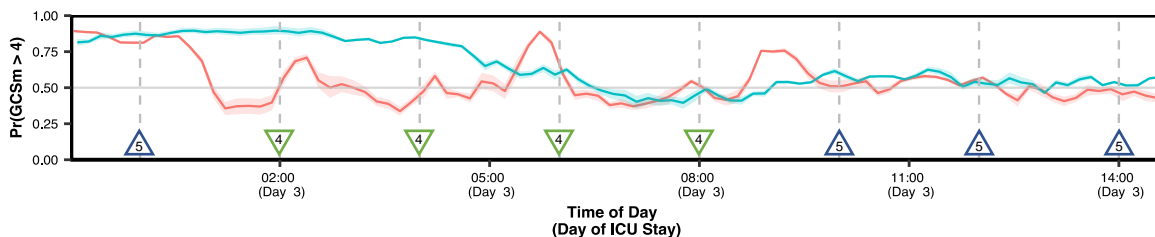

Case No. 5

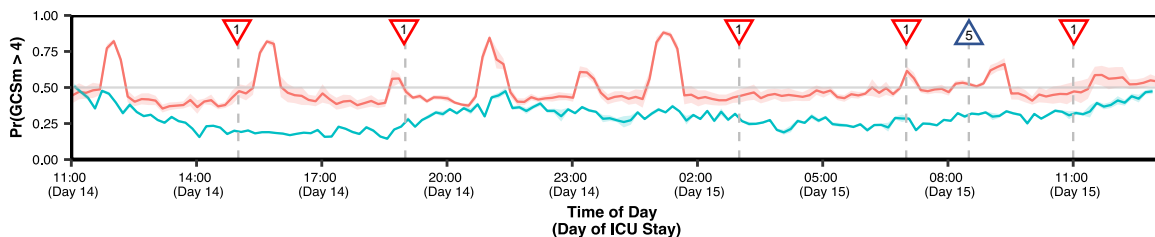

Case No. 6

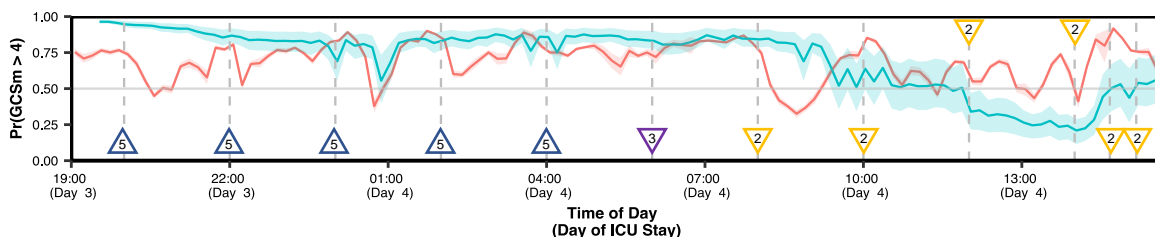

## Observation Window

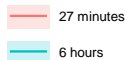

## Best Motor Response (GCSm)

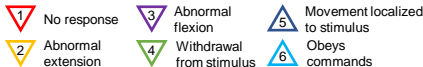

Source: https://www.medrxiv.org/content/10.1101/2021.05.19.21257319v3.full.pdf
